# Supplementary material for: Genome-Wide Analysis of Dental Caries Variability Reveals Genotype-by-Environment Interactions
Source: MDPI journal article supplement (doi:10.3390/genes14030736), 2023-03-17
Supplement: s1 [file s1]

vQTL of dfs in the priamry dentition (IFS)

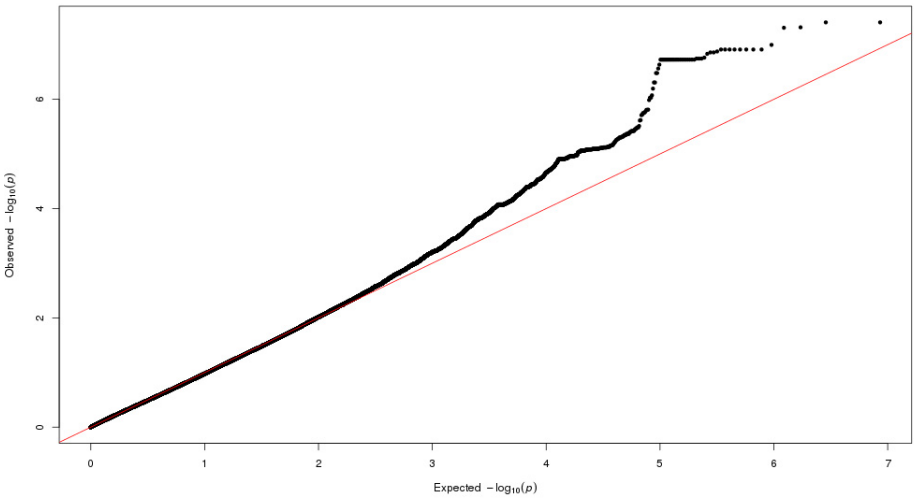

vQTL of dfs in the priamry dentition (COHRA1)

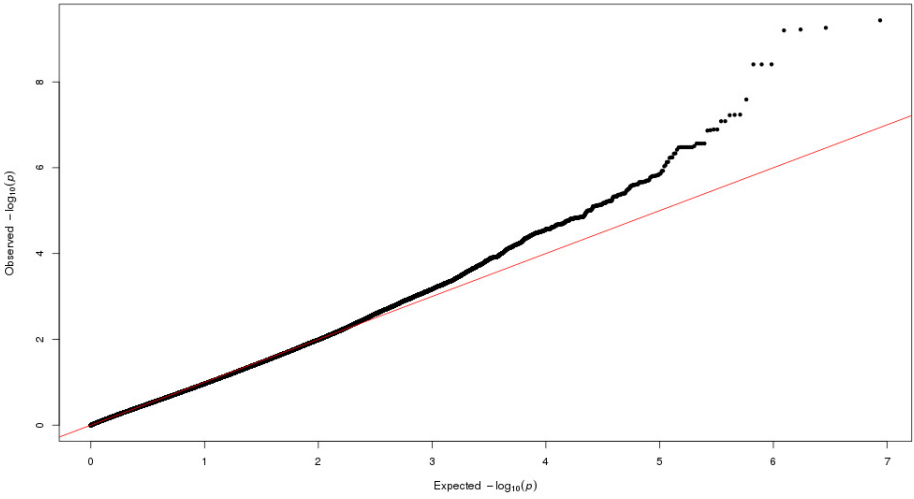

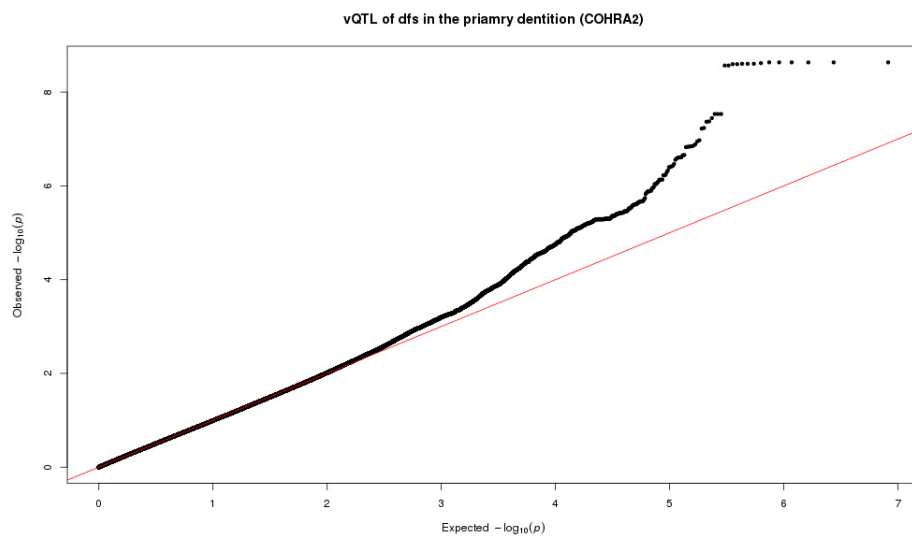

**Figure S1** Quantile-quantile plot for genome-wide vQTL analysis of dfs in IFS, COHRA1, and COHRA2

The genomic inflation factors were 1.00, 1.02, and 1.03 in IFS, COHRA1, and COHRA2, repectively.
