# Supplementary material for: Genome-Wide Analysis of Dental Caries Variability Reveals Genotype-by-Environment Interactions
Source: MDPI journal article supplement (doi:10.3390/genes14030736), 2023-03-17
Supplement: s1 [file s1]

**Table S3.** P values of interactions between SNPs and factors associated with dfs in COHRA2

| No | SNP        | Sex             | Site  | Mother<br>edu. | Mother<br>income | Water<br>source | Fluoride<br>level | Brushing | BF.durat<br>ion | BF.status | SSB1            | SSB2  |
|----|------------|-----------------|-------|----------------|------------------|-----------------|-------------------|----------|-----------------|-----------|-----------------|-------|
| 1  | rs59190052 | 0.151           | 0.327 | 0.637          | 0.565            | 0.211           | 0.693             | 0.865    | 0.884           | 0.050     | 0.492           | 0.438 |
| 2  | rs9830884  | 0.104           | 0.170 | 0.049          | 0.281            | 0.025           | 0.683             | 0.853    | 0.334           | 0.607     | 0.997           | 0.742 |
| 3  | rs77322490 | 0.390           | 0.469 | 0.862          | 0.911            | 0.013           | 0.684             | 0.776    | 0.368           | 0.858     | 0.137           | 0.117 |
| 4  | rs6844159  | 0.001           | 0.275 | 0.966          | 0.232            | 0.395           | 0.697             | 0.027    | 0.285           | 0.211     | 0.812           | 0.815 |
| 5  | rs3947271  | 0.042           | 0.522 | 0.889          | 0.907            | 0.287           | 0.695             | 0.444    | 0.695           | 0.578     | 0.091           | 0.077 |
| 6  | rs1089941  | 0.089           | 0.555 | 0.061          | 0.045            | 0.006*          | 0.291             | 0.189    | 0.793           | 0.102     | 0.079           | 0.338 |
| 7  | rs1491071  | 0.978           | 0.895 | 0.205          | 0.144            | 0.499*          | 0.685             | 0.423    | 0.422           | 0.172     | 0.026           | 0.214 |
| 8  | rs2018981  | 0.776           | 0.729 | 0.807          | 0.856            | 0.713           | 0.699             | 0.658    | 0.832           | 0.295     | 0.097           | 0.157 |
| 10 | rs11199332 | 0.627           | 0.747 | 0.818          | 0.287            | 0.021*          | 0.692             | 0.550    | 0.067           | 0.942     | 0.607           | 0.693 |
| 11 | rs11241707 | 0.703           | 0.928 | 0.156          | 0.611            | 0.097           | 0.690             | 0.742    | 0.262           | 0.218     | 0.581           | 0.631 |
| 12 | rs12429729 | 0.499           | 0.750 | 0.899          | 0.807            | 0.266*          | 0.694             | 0.302    | 0.403           | 0.541     | 0.315           | 0.257 |
| 13 | rs7463853  | 0.201           | 0.263 | 0.049          | 0.510            | 0.107*          | 0.896             | 0.337    | 0.726           | 0.298     | 0.729           | 0.542 |
| 14 | rs690435   | 0.102           | 0.272 | 0.056          | 0.650            | 0.028           | 0.274             | 0.004    | 0.039           | 0.902     | 0.043           | 0.186 |
| 15 | rs12994450 | 0.901           | 0.286 | 0.599          | 0.662            | 0.083           | 0.689             | 0.287    | 0.930           | 0.330     | 0.958           | 0.893 |
| 16 | rs11654217 | 0.670           | 0.239 | 0.627          | 0.252            | 0.761*          | 0.601             | 0.335    | 0.811           | 0.281     | 0.661           | 0.925 |
| 17 | rs264532   | 0.350           | 0.321 | 0.309          | 0.734            | 0.020           | 0.694             | 0.359    | 0.268           | 0.021     | 0.128           | 0.241 |
| 18 | rs12797571 | 0.782           | 0.917 | 0.063          | 0.577            | 0.843           | 0.400             | 0.541    | 0.224           | 0.146     | 0.176           | 0.262 |
| 20 | rs4663531  | 0.490           | 0.749 | 0.334          | 0.993            | 0.191           | 0.277             | 0.630    | 0.689           | 0.564     | 0.008           | 0.062 |
| 21 | rs2090166  | 0.418           | 0.388 | 0.326          | 0.916            | 0.343           | 0.289             | 0.569    | 0.725           | 0.503     | 0.050           | 0.441 |
| 22 | rs3786738  | 0.195           | 0.452 | 0.111          | 0.190            | 0.506           | 0.689             | 0.512    | 0.170           | 0.004     | 0.001           | 0.021 |
| 23 | rs11817228 | 0.043           | 0.735 | 0.604          | 0.090            | 0.850           | 0.690             | 0.660    | 0.040           | 0.262     | 0.360           | 0.345 |
| 24 | rs512158   | 0.402           | 0.185 | 0.007          | 0.259            | 0.010           | 0.267             | 0.479    | 0.628           | 0.522     | 0.004           | 0.002 |
| 25 | rs622516   | 0.00037         | 0.063 | 0.060          | 0.013            | 0.290*          | 0.683             | 0.407    | 0.523           | 0.058     | 0.458           | 0.957 |
| 26 | rs71508615 | <b>6.78E-06</b> | 0.735 | 0.00037        | <b>1.25E-04</b>  | 0.150           | 0.678             | 0.029    | 0.003           | 0.041     | 0.089           | 0.194 |
| 27 | rs9982623  | 0.186           | 0.077 | 0.969          | 0.094            | 0.173           | 0.381             | 0.812    | 0.289           | 0.833     | 0.241           | 0.180 |
| 28 | rs2869342  | 0.751           | 0.902 | 0.022          | 0.600            | 0.314           | 0.684             | 0.801    | 0.118           | 2.4E-04   | 0.817           | 0.692 |
| 29 | rs17536922 | 0.116           | 0.957 | 0.390          | 0.260            | 0.576           | 0.676             | 0.886    | 0.296           | 0.511     | 0.861           | 0.384 |
| 30 | rs10651815 | 0.006           | 0.371 | 0.161          | 0.185            | 0.193           | 0.240             | 0.680    | 0.686           | 0.305     | 0.241           | 0.292 |
| 31 | rs1958016  | 0.648           | 0.174 | 0.055          | 0.060            | 0.187*          | 0.682             | 0.601    | 0.801           | 0.608     | 0.753           | 0.781 |
| 32 | rs73723358 | 0.775           | 0.003 | 0.004          | 0.00014          | 0.022           | 0.676             | 0.461    | 0.052           | 0.814     | <b>7.39E-05</b> | 0.047 |
| 33 | rs7972868  | 0.025           | 0.731 | 0.037          | 0.004            | 0.358           | 0.689             | 0.835    | 0.957           | 0.003     | 0.070           | 0.021 |
| 34 | rs73157913 | 0.337           | 0.237 | 0.223          | 0.433            | 0.047*          | 0.687             | 0.060    | 0.787           | 0.465     | 0.054           | 0.019 |

|    |            |       |       |       |       |       |       |       |       |                 |         |       |
|----|------------|-------|-------|-------|-------|-------|-------|-------|-------|-----------------|---------|-------|
| 35 | rs11923408 | 0.354 | 0.381 | 0.919 | 0.925 | 0.443 | 0.686 | 0.657 | 0.932 | 0.328           | 0.098   | 0.251 |
| 36 | rs9685188  | 0.175 | 0.783 | 0.001 | 0.007 | 0.858 | 0.686 | 0.424 | 0.556 | <b>8.03E-05</b> | 0.00033 | 0.004 |
| 37 | rs3862191  | 0.472 | 0.394 | 0.343 | 0.938 | 0.343 | 0.289 | 0.575 | 0.801 | 0.433           | 0.059   | 0.510 |
| 38 | rs11592458 | 0.025 | 0.162 | 0.006 | 0.123 | 0.064 | 0.689 | 0.684 | 0.115 | 0.207           | 0.614   | 0.914 |
| 39 | rs1497945  | 0.201 | 0.449 | 0.027 | 0.780 | 0.022 | 0.405 | 0.612 | 0.174 | 0.302           | 0.255   | 0.399 |
| 40 | rs1978471  | 0.216 | 0.513 | 0.631 | 0.149 | 0.751 | 0.607 | 0.769 | 0.153 | 0.695           | 0.934   | 0.832 |

---

Note: Bolded numbers are the significant GEI. Mother edu.: mother's educational attainment;

Brushing: Toothbrushing frequency; BF.duration: Breastfeeding duration; BF.status:

Breastfeeding status; SSB: sugar-sweetened beverages.

\* There were no participants having two effect alleles of these SNPs and with water source from well. For these SNPs, we combined genotype groups of two effect alleles and one affect allele, then compared to zero affect allele.
