# Supplementary material for: Genome-Wide Analysis of Dental Caries Variability Reveals Genotype-by-Environment Interactions
Source: MDPI journal article supplement (doi:10.3390/genes14030736), 2023-03-17
Supplement: s1 [file s1]

**Table S1.** P values of interactions between SNPs and factors associated with dfs in IFS

| No. | SNP        | Sex   | Mother edu. | Father edu.     | Income          | Fluoride level | Brushing | Water source | Birth weight | Gest. weeks | Milk intake | 100% juice intake | SSB intake | Fluoride intake | Powder drink intake |
|-----|------------|-------|-------------|-----------------|-----------------|----------------|----------|--------------|--------------|-------------|-------------|-------------------|------------|-----------------|---------------------|
| 1   | rs59190052 | 0.443 | 0.987       | 0.113           | 0.580           | 0.153          | 0.355    | 0.421        | 0.998        | 0.370       | 0.068       | 0.015             | 0.040      | 0.784           | 0.294               |
| 2   | rs9830884  | 0.646 | 0.360       | 0.250           | <b>4.24E-05</b> | 0.133          | 0.277    | 0.767        | 0.794        | 0.709       | 0.311       | 0.039             | 0.148      | 0.282           | 0.677               |
| 3   | rs77322490 | 0.746 | 0.051       | 0.114           | 0.645           | 0.936          | 0.021    | 0.206        | 0.708        | 0.379       | 0.962       | 0.497             | 0.037      | 0.586           | 0.854               |
| 4   | rs6844159  | 0.851 | 0.014       | 0.057           | 0.051           | 0.370          | 0.034    | 0.050        | 0.706        | 0.603       | 0.275       | 0.255             | 0.403      | 0.401           | 0.041               |
| 5   | rs3947271  | 0.349 | 0.028       | 0.028           | 0.032           | 0.798          | 0.052    | 0.260        | 0.022        | 0.448       | 0.403       | 0.656             | 0.475      | 0.409           | 0.002               |
| 6   | rs1089941  | 0.896 | 0.058       | 0.381           | 0.206           | 0.654          | 0.865    | 0.991        | 0.580        | 0.887       | 0.050       | 0.179             | 0.332      | 0.010           | 0.199               |
| 7   | rs1491071  | 0.326 | 0.001       | <b>4.25E-06</b> | 0.202           | 0.991          | 0.719    | 0.253        | 0.416        | 0.954       | 0.136       | 0.813             | 0.060      | 0.138           | 0.195               |
| 8   | rs2018981  | 0.092 | 0.291       | 0.655           | 0.605           | 0.106          | 0.456    | 0.143        | 0.865        | 0.537       | 0.081       | 0.186             | 0.412      | 0.160           | 0.011               |
| 9   | rs11587481 | 0.595 | 0.474       | 0.495           | 0.467           | 0.513          | 0.493    | 0.012        | 0.838        | 0.402       | 0.001       | 0.100             | 0.638      | 0.354           | 0.672               |
| 10  | rs11199332 | 0.355 | 0.081       | 0.634           | 0.226           | 0.202          | 0.150    | 0.077        | 0.874        | 0.907       | 0.065       | 0.605             | 0.308      | 0.075           | 0.773               |
| 11  | rs11241707 | 0.263 | 0.111       | 0.182           | 0.022           | 0.380          | 0.006    | 0.366        | 0.965        | 0.515       | 0.377       | 0.175             | 0.024      | 0.100           | 0.025               |
| 12  | rs12429729 | 0.046 | 0.919       | 0.913           | 0.963           | 0.766          | 0.070    | 0.294        | 0.558        | 0.525       | 0.765       | 0.183             | 0.741      | 0.832           | 0.469               |
| 13  | rs7463853  | 0.651 | 0.074       | 0.921           | 0.385           | 0.292          | 0.517    | 0.981        | 0.207        | 0.491       | 0.644       | 0.816             | 0.515      | 0.353           | 0.330               |
| 14  | rs690435   | 0.960 | 0.134       | 0.265           | 0.121           | 0.989          | 0.117    | 0.400        | 0.083        | 0.507       | 0.699       | 0.486             | 0.472      | 0.818           | 0.036               |
| 15  | rs12994450 | 0.108 | 0.868       | 0.675           | 0.453           | 0.043          | 0.154    | 0.122        | 0.730        | 0.161       | 0.519       | 0.469             | 0.782      | 0.936           | 0.623               |
| 16  | rs11654217 | 0.800 | 0.517       | 0.790           | 0.739           | 0.918          | 0.750    | 0.423        | 0.929        | 0.147       | 0.485       | 0.522             | 0.873      | 0.295           | 0.372               |
| 17  | rs264532   | 0.561 | 0.297       | 0.589           | 0.383           | 0.710          | 0.326    | 0.786        | 0.241        | 0.552       | 0.876       | 0.292             | 0.600      | 0.135           | 0.544               |
| 18  | rs12797571 | 0.661 | 0.619       | 0.986           | 0.358           | 0.145          | 0.236    | 0.725        | 0.443        | 0.715       | 0.696       | 0.445             | 0.786      | 0.609           | 0.273               |
| 19  | rs11970843 | 0.859 | 0.234       | 0.056           | 0.179           | 0.421          | 0.877    | 0.346        | 0.541        | 0.566       | 0.861       | 0.296             | 0.092      | 0.627           | 0.002               |
| 20  | rs4663531  | 0.107 | 0.728       | 0.054           | 0.379           | 0.063          | 0.372    | 0.275        | 0.718        | 0.257       | 0.056       | 0.891             | 0.640      | 0.855           | 0.043               |
| 21  | rs2090166  | 0.109 | 0.270       | 0.181           | 0.975           | 0.303          | 0.476    | 0.394        | 0.695        | 0.536       | 0.848       | 0.731             | 0.092      | 0.332           | 0.034               |
| 22  | rs3786738  | 0.629 | 0.624       | 0.036           | 0.137           | 0.042          | 0.696    | 0.940        | 0.947        | 0.086       | 0.337       | 0.834             | 0.340      | 0.900           | 0.892               |
| 23  | rs11817228 | 0.608 | 0.926       | 0.139           | 0.095           | 0.559          | 0.652    | 0.512        | 0.852        | 0.814       | 0.643       | 0.440             | 0.353      | 0.997           | 0.041               |
| 24  | rs512158   | 0.248 | 0.931       | 0.961           | 0.386           | 0.146          | 0.473    | 0.435        | 0.837        | 0.660       | 0.661       | 0.133             | 0.872      | 0.301           | 0.027               |
| 25  | rs622516   | 0.252 | 0.369       | 0.601           | 0.533           | 0.612          | 0.845    | 0.249        | 0.728        | 0.943       | 0.347       | 0.304             | 0.342      | 0.531           | 0.032               |
| 26  | rs71508615 | 0.004 | 0.984       | 0.549           | 0.966           | 0.788          | 0.774    | 0.961        | 0.039        | 0.249       | 0.011       | 0.904             | 0.977      | 0.680           | 0.594               |
| 27  | rs9982623  | 0.083 | 0.610       | 0.242           | 0.414           | 0.690          | 0.860    | 0.204        | 0.512        | 0.886       | 0.902       | 0.815             | 0.310      | 0.847           | 0.893               |
| 28  | rs2869342  | 0.454 | 0.387       | 0.384           | 0.329           | 0.459          | 0.306    | 0.528        | 0.638        | 0.186       | 0.349       | 0.625             | 0.542      | 0.227           | 0.684               |
| 29  | rs17536922 | 0.674 | 0.260       | 0.124           | 0.294           | 0.083          | 0.470    | 0.101        | 0.520        | 0.686       | 0.329       | 0.112             | 0.128      | 0.814           | 0.554               |
| 30  | rs10651815 | 0.177 | 0.593       | 0.829           | 0.514           | 0.806          | 0.399    | 0.567        | 0.654        | 0.415       | 0.003       | 0.752             | 0.954      | 0.687           | 0.333               |
| 31  | rs1958016  | 0.478 | 0.482       | 0.517           | 0.779           | 0.822          | 0.739    | 0.692        | 0.281        | 0.037       | 0.298       | 0.557             | 0.343      | 0.458           | 0.160               |

|    |            |       |       |       |       |       |                 |       |       |       |       |       |       |       |       |
|----|------------|-------|-------|-------|-------|-------|-----------------|-------|-------|-------|-------|-------|-------|-------|-------|
| 32 | rs73723358 | 0.542 | 0.735 | 0.343 | 0.813 | 0.156 | 0.301           | 0.263 | 0.915 | 0.582 | 0.978 | 0.301 | 0.289 | 0.743 | 0.501 |
| 33 | rs7972868  | 0.771 | 0.562 | 0.972 | 0.287 | 0.406 | 0.983           | 0.980 | 0.634 | 0.540 | 0.890 | 0.669 | 0.064 | 0.977 | 0.039 |
| 34 | rs73157913 | 0.792 | 0.221 | 0.611 | 0.143 | 0.491 | 0.898           | 0.488 | 0.926 | 0.743 | 0.405 | 0.343 | 0.217 | 0.566 | 0.602 |
| 35 | rs11923408 | 0.507 | 0.657 | 0.897 | 0.283 | 0.220 | 0.591           | 0.623 | 0.730 | 0.951 | 0.915 | 0.685 | 0.863 | 0.054 | 0.225 |
| 36 | rs9685188  | 0.672 | 0.853 | 0.552 | 0.408 | 0.469 | 0.089           | 0.010 | 0.722 | 0.233 | 0.736 | 0.535 | 0.725 | 0.498 | 0.413 |
| 37 | rs3862191  | 0.109 | 0.270 | 0.181 | 0.975 | 0.303 | 0.476           | 0.394 | 0.695 | 0.536 | 0.848 | 0.731 | 0.092 | 0.332 | 0.034 |
| 38 | rs11592458 | 0.551 | 0.792 | 0.218 | 0.060 | 0.662 | 0.151           | 0.153 | 0.633 | 0.487 | 0.679 | 0.532 | 0.005 | 0.096 | 0.842 |
| 39 | rs1497945  | 0.183 | 0.390 | 0.529 | 0.203 | 0.420 | 0.612           | 0.541 | 0.412 | 0.386 | 0.138 | 0.083 | 0.507 | 0.190 | 0.007 |
| 40 | rs1978471  | 0.045 | 0.002 | 0.002 | 0.076 | 0.628 | <b>3.15E-05</b> | 0.325 | 0.374 | 0.584 | 0.057 | 0.815 | 0.311 | 0.502 | 0.001 |

Note: Bolded numbers are the significant GEI. Income: household income; Mother edu.: mother's educational attainment; Father edu.: father's educational attainment; Brushing: Toothbrushing frequency; Gest.weeks: Gestational weeks; Powder drink intake: Powdered beverage intake.
