# Supplementary material for: Genome-Wide Analysis of Dental Caries Variability Reveals Genotype-by-Environment Interactions
Source: MDPI journal article supplement (doi:10.3390/genes14030736), 2023-03-17
Supplement: s1 [file s1]

**Table S2.** P values of interactions between SNPs and factors associated with dfs in COHRA1

| No | SNP        | Sex   | Site  | Mother<br>edu. | Father<br>edu. | Mother<br>income | Father<br>income | Fluoride.<br>level | Brushin<br>g | Water<br>Source | Fluoride<br>supplement |
|----|------------|-------|-------|----------------|----------------|------------------|------------------|--------------------|--------------|-----------------|------------------------|
| 1  | rs59190052 | 0.616 | 0.956 | 0.182          | 0.063          | 0.884            | 0.956            | 0.216              | 0.563        | 0.851           | 0.077                  |
| 2  | rs9830884  | 0.757 | 0.104 | 0.560          | 0.264          | 0.305            | 0.354            | 0.566              | 0.515        | 0.126           | 0.757                  |
| 3  | rs77322490 | 0.258 | 0.874 | 0.092          | 0.305          | 0.800            | 0.776            | 0.013              | 0.348        | 0.731           | 0.751                  |
| 4  | rs6844159  | 0.651 | 0.609 | 0.542          | 0.574          | 0.163            | 0.876            | 0.101              | 0.225        | 0.697           | 0.595                  |
| 5  | rs3947271  | 0.678 | 0.289 | 0.108          | 0.344          | 0.636            | 0.886            | 0.698              | 0.472        | 0.565           | 0.667                  |
| 6  | rs1089941  | 0.674 | 0.074 | 0.410          | 0.235          | 0.223            | 0.773            | 0.951              | 0.109        | 0.412           | 0.694                  |
| 7  | rs1491071  | 0.619 | 0.925 | 0.641          | 0.432          | 0.599            | 0.483            | 0.828              | 0.655        | 0.537           | 0.053                  |
| 8  | rs2018981  | 0.253 | 0.807 | 0.781          | 0.344          | 0.468            | 0.104            | 0.688              | 0.467        | 0.711           | 0.315                  |
| 9  | rs11587481 | 0.386 | 0.127 | 0.222          | 0.707          | 0.771            | 0.866            | 0.820              | 0.911        | 0.568           | 0.011                  |
| 10 | rs11199332 | 0.081 | 0.698 | 0.476          | 0.933          | 0.535            | 0.936            | 0.431              | 0.025        | 0.649           | 0.858*                 |
| 11 | rs11241707 | 0.648 | 0.724 | 0.222          | 0.698          | 0.593            | 0.651            | 0.970              | 0.234        | 0.854           | 0.474                  |
| 12 | rs12429729 | 0.353 | 0.004 | 0.023          | 0.003          | 0.008            | 0.003            | 0.954              | 0.030        | 0.001           | 0.887                  |
| 13 | rs7463853  | 0.418 | 0.021 | 0.167          | 3.1E-04        | 0.033            | <b>3.50E-05</b>  | 0.688              | 0.047        | 0.135           | 0.06                   |
| 14 | rs690435   | 0.936 | 0.165 | 0.841          | 0.062          | 0.209            | 0.192            | 0.434              | 0.060        | 0.005           | 0.156                  |
| 15 | rs12994450 | 0.312 | 0.869 | 0.711          | 0.177          | 0.137            | 0.001            | 0.093              | 0.057        | 0.124           | 0.091                  |
| 16 | rs11654217 | 0.634 | 0.023 | 0.004          | 0.083          | 0.055            | 0.067            | 0.897              | 0.320        | 0.128           | 0.217                  |
| 17 | rs264532   | 0.861 | 0.384 | 0.616          | 0.286          | 0.901            | 0.090            | 0.003              | 0.005        | 4.5E-04         | 0.113*                 |
| 18 | rs12797571 | 0.296 | 0.263 | 0.084          | 0.016          | 0.150            | 0.003            | 0.943              | 0.258        | 0.050           | 0.737                  |
| 19 | rs11970843 | 0.514 | 0.418 | 0.004          | 0.482          | 0.537            | 0.129            | 0.925              | 0.711        | 0.721           | 0.042                  |
| 20 | rs4663531  | 0.021 | 0.294 | 0.457          | 0.262          | 0.295            | 0.874            | 0.102              | 0.462        | 0.012           | 0.802                  |
| 21 | rs2090166  | 0.330 | 0.405 | 0.108          | 0.811          | 0.402            | 0.229            | 0.054              | 0.354        | 0.403           | 0.716                  |
| 22 | rs3786738  | 0.877 | 0.817 | 0.836          | 0.806          | 0.064            | 0.191            | 0.744              | 0.311        | 0.207           | 0.824                  |
| 23 | rs11817228 | 0.528 | 0.339 | 0.913          | 0.952          | 0.170            | 0.646            | 0.704              | 0.743        | 0.674           | 0.589                  |
| 24 | rs512158   | 0.828 | 0.921 | 0.697          | 0.922          | 0.597            | 0.603            | 0.647              | 0.965        | 0.760           | 0.259                  |
| 25 | rs622516   | 0.649 | 0.483 | 0.670          | 0.977          | 0.594            | 0.424            | 0.107              | 0.272        | 0.236           | 0.093                  |
| 26 | rs71508615 | 0.378 | 0.861 | 0.866          | 0.335          | 0.556            | 0.555            | 0.651              | 0.084        | 0.295           | 0.77                   |
| 27 | rs9982623  | 0.406 | 0.155 | 0.494          | 0.320          | 0.220            | 0.677            | 0.622              | 0.848        | 0.307           | 0.125                  |
| 28 | rs2869342  | 0.755 | 0.865 | 0.517          | 0.642          | 0.540            | 0.928            | 0.117              | 0.330        | 0.293           | 0.164                  |
| 29 | rs17536922 | 0.449 | 0.644 | 0.788          | 0.802          | 0.506            | 0.243            | 0.865              | 0.208        | 0.346           | 0.134*                 |
| 30 | rs10651815 | 0.856 | 0.681 | 0.174          | 0.860          | 0.821            | 0.227            | 0.101              | 0.181        | 0.158           | 0.582                  |
| 31 | rs1958016  | 0.109 | 0.924 | 0.914          | 0.894          | 0.704            | 0.977            | 0.121              | 0.909        | 0.432           | 0.222                  |
| 32 | rs73723358 | 0.334 | 0.343 | 0.103          | 0.121          | 0.768            | 0.195            | 0.394              | 0.951        | 0.240           | 0.791*                 |

|    |            |       |       |       |       |       |       |       |       |       |        |
|----|------------|-------|-------|-------|-------|-------|-------|-------|-------|-------|--------|
| 33 | rs7972868  | 0.714 | 0.774 | 0.224 | 0.468 | 0.869 | 0.961 | 0.666 | 0.099 | 0.291 | 0.348  |
| 34 | rs73157913 | 0.472 | 0.945 | 0.176 | 0.687 | 0.532 | 0.679 | 0.157 | 0.440 | 0.903 | 0.946* |
| 35 | rs11923408 | 0.314 | 0.545 | 0.505 | 0.902 | 0.381 | 0.570 | 0.256 | 0.298 | 0.545 | 0.614  |
| 36 | rs9685188  | 0.602 | 0.679 | 0.444 | 0.885 | 0.899 | 0.791 | 0.497 | 0.239 | 0.328 | 0.535  |
| 37 | rs3862191  | 0.366 | 0.399 | 0.103 | 0.795 | 0.414 | 0.219 | 0.068 | 0.344 | 0.413 | 0.7    |
| 38 | rs11592458 | 0.244 | 0.085 | 0.685 | 0.428 | 0.630 | 0.396 | 0.370 | 0.602 | 0.306 | 0.631  |
| 39 | rs1497945  | 0.458 | 0.342 | 0.590 | 0.410 | 0.172 | 0.161 | 0.295 | 0.915 | 0.267 | 0.875  |
| 40 | rs1978471  | 0.804 | 0.256 | 0.236 | 0.218 | 0.019 | 0.078 | 0.578 | 0.326 | 0.021 | 0.109  |

---

Note: Bolded numbers are the significant GEI. Mother edu.: mother's educational attainment; Father edu.: father's educational attainment; Brushing: Toothbrushing frequency.

\* There were no participants having two effect alleles of these SNPs and taking fluoride supplement. For these SNPs, we combined genotype groups of two effect alleles and one affect allele, then compared to zero affect allele.
