# Supplementary material for: Genome-Wide Analysis of Dental Caries Variability Reveals Genotype-by-Environment Interactions
Source: Genes (Basel). 2023 Mar 17;14(3):736. doi: 10.3390/genes14030736 (PMC10048401; doi:10.3390/genes14030736)
Supplement: Supplementary file 1 [file genes-14-00736-s001.zip]

Archive with 9 entries (9 files):
- Figure S1.pdf
- genes-2231568-g001.tif
- genes-2231568-g002.tif
- genes-2231568-g003a.tif
- genes-2231568-g003b.tif
- genes-2231568.xml
- Table S1.pdf
- Table S2.pdf
- Table S3.pdf
