# Supplementary material for: Genome-Wide Analysis of Dental Caries Variability Reveals Genotype-by-Environment Interactions
Source: Genes (Basel). 2023 Mar 17;14(3):736. doi: 10.3390/genes14030736 (PMC10048401; doi:10.3390/genes14030736)
Supplement: Supplementary file 1 [file genes-14-00736-s001.zip › genes-2231568.xml]

<?xml version="1.0" encoding="UTF-8"?>
<!DOCTYPE article PUBLIC "-//NLM//DTD JATS (Z39.96) Journal Publishing DTD v1.3 20210610//EN" "JATS-journalpublishing1-3.dtd">
<article xmlns:mml="http://www.w3.org/1998/Math/MathML" xmlns:xlink="http://www.w3.org/1999/xlink" article-type="research-article" dtd-version="1.3" xml:lang="en">
  <front>
    <journal-meta>
      <journal-id journal-id-type="publisher-id">genes</journal-id>
      <journal-title-group>
        <journal-title>Genes</journal-title>
        <abbrev-journal-title abbrev-type="publisher">Genes</abbrev-journal-title>
        <abbrev-journal-title abbrev-type="pubmed">Genes</abbrev-journal-title>
      </journal-title-group>
      <issn pub-type="epub">2073-4425</issn>
      <publisher>
        <publisher-name>MDPI</publisher-name>
      </publisher>
    </journal-meta>
    <article-meta>
      <article-id pub-id-type="doi">10.3390/genes14030000</article-id>
      <article-id pub-id-type="publisher-id">genes-2231568</article-id>
      <article-categories>
        <subj-group>
          <subject>Article</subject>
        </subj-group>
      </article-categories>
      <title-group>
        <article-title>Genome-Wide Analysis of Dental Caries Variability Reveals Genotype-by-Environment Interactions</article-title>
      </title-group>
      <contrib-group>
        <contrib contrib-type="author">
          <name>
            <surname>Zou</surname>
            <given-names>Tianyu</given-names>
          </name>
          <role vocab="credit" vocab-identifier="https://credit.niso.org/" vocab-term="Conceptualization" vocab-term-identifier="https://credit.niso.org/contributor-roles/conceptualization/">Conceptualization</role>
          <role vocab="credit" vocab-identifier="https://credit.niso.org/" vocab-term="Methodology" vocab-term-identifier="https://credit.niso.org/contributor-roles/methodology/">Methodology</role>
          <role vocab="credit" vocab-identifier="https://credit.niso.org/" vocab-term="Software" vocab-term-identifier="https://credit.niso.org/contributor-roles/software/">Software</role>
          <role vocab="credit" vocab-identifier="https://credit.niso.org/" vocab-term="Validation" vocab-term-identifier="https://credit.niso.org/contributor-roles/validation/">Validation</role>
          <role vocab="credit" vocab-identifier="https://credit.niso.org/" vocab-term="Formal analysis" vocab-term-identifier="https://credit.niso.org/contributor-roles/formal-analysis/">Formal analysis</role>
          <role vocab="credit" vocab-identifier="https://credit.niso.org/" vocab-term="Investigation" vocab-term-identifier="https://credit.niso.org/contributor-roles/investigation/">Investigation</role>
          <role vocab="credit" vocab-identifier="https://credit.niso.org/" vocab-term="Data curation" vocab-term-identifier="https://credit.niso.org/contributor-roles/data-curation/">Data curation</role>
          <role vocab="credit" vocab-identifier="https://credit.niso.org/" vocab-term="Writing &#x2013; original draft" vocab-term-identifier="https://credit.niso.org/contributor-roles/writing-original-draft/">Writing &#x2013; original draft</role>
          <role vocab="credit" vocab-identifier="https://credit.niso.org/" vocab-term="Visualization" vocab-term-identifier="https://credit.niso.org/contributor-roles/visualization/">Visualization</role>
          <xref rid="af1-genes-2231568" ref-type="aff">1</xref>
        </contrib>
        <contrib contrib-type="author">
          <contrib-id contrib-id-type="orcid" authenticated="true">https://orcid.org/0000-0001-6682-238X</contrib-id>
          <name>
            <surname>Foxman</surname>
            <given-names>Betsy</given-names>
          </name>
          <role vocab="credit" vocab-identifier="https://credit.niso.org/" vocab-term="Resources" vocab-term-identifier="https://credit.niso.org/contributor-roles/resources/">Resources</role>
          <role vocab="credit" vocab-identifier="https://credit.niso.org/" vocab-term="Writing &#x2013; review &amp; editing" vocab-term-identifier="https://credit.niso.org/contributor-roles/writing-review-editing/">Writing &#x2013; review &amp; editing</role>
          <xref rid="af2-genes-2231568" ref-type="aff">2</xref>
        </contrib>
        <contrib contrib-type="author">
          <name>
            <surname>McNeil</surname>
            <given-names>Daniel W.</given-names>
          </name>
		  <role vocab="credit" vocab-identifier="https://credit.niso.org/" vocab-term="Resources" vocab-term-identifier="https://credit.niso.org/contributor-roles/resources/">Resources</role>
		  <role vocab="credit" vocab-identifier="https://credit.niso.org/" vocab-term="Writing &#x2013; review &amp; editing" vocab-term-identifier="https://credit.niso.org/contributor-roles/writing-review-editing/">Writing &#x2013; review &amp; editing</role>
          <xref rid="af3-genes-2231568" ref-type="aff">3</xref>
        </contrib>
        <contrib contrib-type="author">
          <name>
            <surname>Weinberg</surname>
            <given-names>Seth M.</given-names>
          </name>
          <role vocab="credit" vocab-identifier="https://credit.niso.org/" vocab-term="Writing &#x2013; review &amp; editing" vocab-term-identifier="https://credit.niso.org/contributor-roles/writing-review-editing/">Writing &#x2013; review &amp; editing</role>
          <role vocab="credit" vocab-identifier="https://credit.niso.org/" vocab-term="Supervision" vocab-term-identifier="https://credit.niso.org/contributor-roles/supervision/">Supervision</role>
          <role vocab="credit" vocab-identifier="https://credit.niso.org/" vocab-term="Project administration" vocab-term-identifier="https://credit.niso.org/contributor-roles/project-administration/">Project administration</role>
          <role vocab="credit" vocab-identifier="https://credit.niso.org/" vocab-term="Funding acquisition" vocab-term-identifier="https://credit.niso.org/contributor-roles/funding-acquisition/">Funding acquisition</role>
          <xref rid="af1-genes-2231568" ref-type="aff">1</xref>
          <xref rid="af4-genes-2231568" ref-type="aff">4</xref>
        </contrib>
        <contrib contrib-type="author">
          <contrib-id contrib-id-type="orcid" authenticated="true">https://orcid.org/0000-0002-2648-2832</contrib-id>
          <name>
            <surname>Marazita</surname>
            <given-names>Mary L.</given-names>
          </name>
          <role vocab="credit" vocab-identifier="https://credit.niso.org/" vocab-term="Resources" vocab-term-identifier="https://credit.niso.org/contributor-roles/resources/">Resources</role>
          <role vocab="credit" vocab-identifier="https://credit.niso.org/" vocab-term="Writing &#x2013; review &amp; editing" vocab-term-identifier="https://credit.niso.org/contributor-roles/writing-review-editing/">Writing &#x2013; review &amp; editing</role>
          <role vocab="credit" vocab-identifier="https://credit.niso.org/" vocab-term="Project administration" vocab-term-identifier="https://credit.niso.org/contributor-roles/project-administration/">Project administration</role>
          <role vocab="credit" vocab-identifier="https://credit.niso.org/" vocab-term="Funding acquisition" vocab-term-identifier="https://credit.niso.org/contributor-roles/funding-acquisition/">Funding acquisition</role>
          <xref rid="af1-genes-2231568" ref-type="aff">1</xref>
          <xref rid="af4-genes-2231568" ref-type="aff">4</xref>
          <xref rid="af5-genes-2231568" ref-type="aff">5</xref>
        </contrib>
        <contrib contrib-type="author">
          <contrib-id contrib-id-type="orcid" authenticated="true">https://orcid.org/0000-0003-1897-1131</contrib-id>
          <name>
            <surname>Shaffer</surname>
            <given-names>John R.</given-names>
          </name>
          <role vocab="credit" vocab-identifier="https://credit.niso.org/" vocab-term="Conceptualization" vocab-term-identifier="https://credit.niso.org/contributor-roles/conceptualization/">Conceptualization</role>
          <role vocab="credit" vocab-identifier="https://credit.niso.org/" vocab-term="Methodology" vocab-term-identifier="https://credit.niso.org/contributor-roles/methodology/">Methodology</role>
          <role vocab="credit" vocab-identifier="https://credit.niso.org/" vocab-term="Validation" vocab-term-identifier="https://credit.niso.org/contributor-roles/validation/">Validation</role>
          <role vocab="credit" vocab-identifier="https://credit.niso.org/" vocab-term="Writing &#x2013; original draft" vocab-term-identifier="https://credit.niso.org/contributor-roles/writing-original-draft/">Writing &#x2013; original draft</role>
          <role vocab="credit" vocab-identifier="https://credit.niso.org/" vocab-term="Supervision" vocab-term-identifier="https://credit.niso.org/contributor-roles/supervision/">Supervision</role>
          <role vocab="credit" vocab-identifier="https://credit.niso.org/" vocab-term="Project administration" vocab-term-identifier="https://credit.niso.org/contributor-roles/project-administration/">Project administration</role>
          <role vocab="credit" vocab-identifier="https://credit.niso.org/" vocab-term="Funding acquisition" vocab-term-identifier="https://credit.niso.org/contributor-roles/funding-acquisition/">Funding acquisition</role>
          <xref rid="af1-genes-2231568" ref-type="aff">1</xref>
          <xref rid="af4-genes-2231568" ref-type="aff">4</xref>
          <xref rid="c1-genes-2231568" ref-type="corresp">*</xref>
        </contrib>
      </contrib-group>
      <contrib-group>
        <contrib contrib-type="editor">
          <name>
            <surname>Diekwisch</surname>
            <given-names>Thomas G.H.</given-names>
          </name>
          <role>Academic Editor</role>
        </contrib>
      </contrib-group>
      <aff id="af1-genes-2231568"><label>1</label>Department of Human Genetics, School of Public Health, University of Pittsburgh, Pittsburgh, PA 15261, USA; <email>tiz45@pitt.edu</email> (T.Z.); <email>smwst46@pitt.edu</email> (S.M.W.); <email>marazita@pitt.edu</email> (M.L.M.)</aff>
      <aff id="af2-genes-2231568"><label>2</label>Department of Epidemiology, University of Michigan Medical School, Ann Arbor, MI 48109, USA; <email>bfoxman@umich.edu</email></aff>
      <aff id="af3-genes-2231568"><label>3</label>Department of Community Dentistry and Behavioral Science, College of Dentistry, University of Florida, Gainesville, FL 32610, USA; <email>dmcneil@dental.ufl.edu</email></aff>
      <aff id="af4-genes-2231568"><label>4</label>Center for Craniofacial and Dental Genetics, Department of Oral and Craniofacial Sciences, School of Dental Medicine, University of Pittsburgh, Pittsburgh, PA 15219, USA</aff>
      <aff id="af5-genes-2231568"><label>5</label>Clinical and Translational Sciences, School of Medicine, University of Pittsburgh, Pittsburgh, PA 15213, USA</aff>
      <author-notes>
        <corresp id="c1-genes-2231568"><label>*</label>Correspondence: <email>john.r.shaffer@pitt.edu</email></corresp>
      </author-notes>
      <pub-date pub-type="epub">
        <day>17</day>
        <month>03</month>
        <year>2023</year>
      </pub-date>
      <pub-date pub-type="collection">
        <month>03</month>
        <year>2023</year>
      </pub-date>
      <volume>14</volume>
      <issue>3</issue>
      <elocation-id>0</elocation-id>
      <history>
        <date date-type="received">
          <day>04</day>
          <month>02</month>
          <year>2023</year>
        </date>
        <date date-type="rev-recd">
          <day>09</day>
          <month>03</month>
          <year>2023</year>
        </date>
        <date date-type="accepted">
          <day>15</day>
          <month>03</month>
          <year>2023</year>
        </date>
      </history>
      <permissions>
        <copyright-statement>&#xA9; 2023 by the authors.</copyright-statement>
        <copyright-year>2023</copyright-year>
        <license license-type="open-access">
          <license-p>Licensee MDPI, Basel, Switzerland. This article is an open access article distributed under the terms and conditions of the Creative Commons Attribution (CC BY) license (<ext-link ext-link-type="uri" xlink:href="https://creativecommons.org/licenses/by/4.0/">https://creativecommons.org/licenses/by/4.0/</ext-link>).</license-p>
        </license>
      </permissions>
      <abstract>
        <p>Genotype-by-environment interactions (GEI) may influence dental caries, although their effects are difficult to detect. Variance quantitative trait loci (vQTL) may serve as an indicator of underlying GEI effects. The aim of this study was to investigate GEI effects on dental caries by prioritizing variants from genome-wide vQTL analysis. First, we identified vQTLs from ~4.3 M genome-wide variants in three cohorts of white children aged 3&#x2013;5 (n = 396, n = 328, n = 773) using Levene&#x2019;s test. A total of 39 independent vQTLs with <italic>p</italic> &lt; 1 &#xD7; 10<sup>&#x2212;6</sup> were identified, some of which were located in or near genes with plausible biological roles in dental caries (<italic>IGFBP7</italic>, <italic>SLC5A8</italic>, and <italic>SHH</italic> involved in tooth development and enamel mineralization). Next, we used linear regression to test GEI effects on dental caries with the 39 prioritized variants and self-reported environmental factors (demographic, socioeconomic, behavioral, and dietary factors) in the three cohorts separately. We identified eight significant GEIs indicating that children with vQTL risk genotypes had higher caries experience if they had less educated parents, lower household/parental income, brushed their teeth less frequently, consumed sugar-sweetened beverages more frequently, were not breastfed, and were female. We reported the first genome-wide vQTL analysis of dental caries in children nominating several novel genes and GEI for further investigations.</p>
      </abstract>
      <kwd-group>
        <kwd>genome-wide vQTL</kwd>
        <kwd>genotype-by-environment interactions</kwd>
        <kwd>dental caries</kwd>
      </kwd-group>
      <funding-group>
        <award-group>
          <funding-source>U.S. National Institutes of Health (NIH)</funding-source>
          <award-id>R01-DE014899</award-id>
		  <award-id>U01-DE018903</award-id>
		  <award-id>X01-HG009878</award-id>
		  <award-id>R01-DE09551</award-id>
		  <award-id>P30-DE10126</award-id>
		</award-group>
        <funding-statement>This study was supported by U.S. National Institutes of Health (NIH) grants R01-DE014899, U01-DE018903, X01-HG009878, R01-DE09551, and P30-DE10126.</funding-statement>
      </funding-group>
    </article-meta>
  </front>
  <body>
    <sec id="sec1-genes-2231568" sec-type="intro">
      <title>1. Introduction</title>
      <p>The etiology of dental caries is complex, involving both genetic and environmental/behavioral risk and protective factors (e.g., diet, oral hygiene/behaviors, and fluoride exposure). The effects of genetic factors on caries risk may differ among individuals across environmental/social strata due to genotype-by-environment interactions (GEI). For individuals, the consequence of this complexity is that the impact of environmental risk factors on their susceptibility to caries varies with their genetics. Therefore, investigating GEI in dental caries can aid in discovering additional susceptibility loci for dental caries, identifying populations at high risk, and developing more accurate genetic risk prediction tools. However, GEI are challenging to study because they require relatively large samples with well-characterized phenotypes, genotypes, and environmental risk factors.</p>
      <p>To date, few studies have investigated GEI for dental caries. Using candidate gene approaches, Shaffer et al. [<xref ref-type="bibr" rid="B1-genes-2231568">1</xref>] tested the interaction effects between four enamel matrix genes with fluoride exposure on caries experience. They found participants with risk alleles of two genetic variants (upstream of <italic>TUFT1</italic> and missense in <italic>AMBN</italic>) showed higher levels of dental caries, but only if they lacked sufficient exposure to fluoride. Also using a candidate gene approach, Yildiz et al. [<xref ref-type="bibr" rid="B2-genes-2231568">2</xref>] found weak evidence that the interactions between three genetic variants in genes <italic>CA6</italic>, <italic>DEFB1</italic>, and <italic>TAS2R38</italic> with dental plaque, lactobacilli count, age, and saliva buffer capacity associated with caries experience in 154 adults. A genome-wide GEI study of 709 US children evaluated the interaction between the presence of oral Streptococcus mutans, a putative caries-promoting bacteria, and host caries susceptibility [<xref ref-type="bibr" rid="B3-genes-2231568">3</xref>]. Three suggestive loci in genes <italic>IL32</italic>, <italic>GALK2</italic>, and <italic>CELF4</italic> were identified that interacted with S. mutans, but no genome-wide significant signals were observed. The limited success of these prior studies may be due to the narrow range of genes and environmental factors tested and/or low power due to small sample sizes.</p>
      <p>There are several well-known challenges that impede our ability to detect GEI effects in human studies. First, an accurate record of environmental risk factors is challenging to collect. Second, identifying GEI effects requires larger sample sizes compared to detecting main effects due to the potentially small effect sizes of GEI and increased dimensionality (i.e., joint genetic-environment strata) across which the effects are modeled. Moreover, these challenges are exacerbated in the context of genome-wide association studies (GWAS), where millions of SNPs, and potentially a large number of environments, are tested for GEI effects. A more efficient strategy is therefore needed to address these problems.</p>
      <p>One such strategy is to target genetic variants known as variance quantitative trait loci (vQTL), which have effects on the variability of a trait [<xref ref-type="bibr" rid="B4-genes-2231568">4</xref>], i.e., showing genetic variance heterogeneity. vQTL analysis provides a method to reduce the scope of GEI testing by prioritizing SNPs mostly likely to be involved in interactions and can be performed even in the absence of data on the interacting risk factor. The idea is that if a genetic variant is associated with the variance of a quantitative phenotype (i.e., the variant is a vQTL), then it may influence the phenotype by interacting with an environmental factor (i.e., GEI). Thus, a two-step approach can be utilized to preserve power for GEI analysis: (1) performing a genome-wide scan for variants with vQTL effects on the phenotype; (2) using the identified vQTLs in interaction modeling to detect GEI associated with the phenotype [<xref ref-type="bibr" rid="B5-genes-2231568">5</xref>,<xref ref-type="bibr" rid="B6-genes-2231568">6</xref>].</p>
      <p>In this study, we applied the aforementioned two-stage design for detecting GEI in dental caries in several well-charactered cohorts of children. Specifically, we first performed genome-wide vQTL scans (in each cohort separately and combined via meta-analysis) and then tested prioritized discovered variants for interaction effects with several environmental risk factors.</p>
    </sec>
    <sec id="sec2-genes-2231568">
      <title>2. Materials and Methods</title>
      <sec id="sec2dot1-genes-2231568">
        <title>2.1. Study Samples</title>
        <p>We conducted individual genome-wide vQTL scans on three cohorts: the Iowa Fluoride Study (IFS, n = 396), the Center for Oral Health Research in Appalachia, cohort 1 (COHRA1, n = 328), and cohort 2 (COHRA2, n = 773). All participants were unrelated children of European ancestry at approximately 3&#x2013;5 years of age. The study design and recruitment descriptions of the three cohorts have been reported before [<xref ref-type="bibr" rid="B7-genes-2231568">7</xref>,<xref ref-type="bibr" rid="B8-genes-2231568">8</xref>,<xref ref-type="bibr" rid="B9-genes-2231568">9</xref>,<xref ref-type="bibr" rid="B10-genes-2231568">10</xref>,<xref ref-type="bibr" rid="B11-genes-2231568">11</xref>]. Briefly, IFS is a longitudinal birth cohort that recruited mothers and newborns from eight Iowa hospital postpartum units between 1992&#x2013;1995 and has been collecting fluoride exposure, diet, and other information related to dental fluorosis and caries. COHRA1 is a population-based cohort established in 2000 that recruited northern Appalachian families aiming to understand contributing factors to oral diseases. COHRA2 is a longitudinal study and has been recruiting and prospectively following pregnant white women from Pennsylvania and West Virginia and their children starting in 2011. This cohort has information on genetic, microbial, behavioral, and environmental factors involved in oral health. We conducted the power analysis based on the significance level at 1 &#xD7; 10<sup>&#x2212;6</sup>, minor allele frequency (MAF) spectrum (0&#x2013;0.5), and effect size spectrum of phenotypic variability (0.1&#x2013;1); we had enough power (&gt;80%) to detect associations of SNPs with effect size &gt; 0.1 and MAF &gt; 0.1 in our study sample size. Written parental consent was provided prior to each child&#x2019;s participation in their respective study and Institutional Review Boards at the University of Iowa, University of Pittsburgh and West Virginia University approved all aspects of the study.</p>
      </sec>
      <sec id="sec2dot2-genes-2231568">
        <title>2.2. Genotyping</title>
        <p>IFS and COHRA1 children were genotyped for about 580,000 SNPs by the Center for Inherited Disease Research at Johns Hopkins University using the Illumina Human610-Quadv1_B BeadChip (Illumina Inc., San Diego, CA, USA). Ungenotyped single nucleotide polymorphisms (SNPs) and sporadic missing data of genotyped autosomal SNPs were imputed for a total of 16.2 million genetic variants using Michigan Imputation Server (Minimac 4) [<xref ref-type="bibr" rid="B12-genes-2231568">12</xref>] and Haplotype Reference Consortium (HRC) r1.1 as the reference panel [<xref ref-type="bibr" rid="B13-genes-2231568">13</xref>]. Participants in COHRA2 were genotyped by the same Center using the Infinium Multi-Ethnic Global-8 v1.0 Array and imputed using the Michigan Imputation Server (Minimac 3 for autosomal chromosomes), and HRCr1.1 as the reference panel. Across the three cohorts, variants were excluded if they had low imputation quality (INFO score &lt; 0.3), departed from Hardy-Weinberg equilibrium (<italic>p</italic> &lt; 1 &#xD7; 10<sup>&#x2212;6</sup>), or had minor allele frequencies &lt; 10%. Approximately 4.3 million variants were included in the genome-wide vQTL analyses across the three cohorts.</p>
      </sec>
      <sec id="sec2dot3-genes-2231568">
        <title>2.3. Phenotyping</title>
        <p>The decayed and filled surfaces (dfs) index in the primary dentition was obtained through intra-oral examinations in each cohort. We performed the analyses in the subsets of participants after the following processing steps: (1) included children had at least one primary tooth; (2) biological relatives were excluded (with one member per kinship retained at random); (3) genetic ancestry outliers were excluded based on calculated principal components (PCs) of ancestry using principal component analysis (PCA) of genome-wide genetic data and excluding participants with PC1 and PC2 more than 3 standard deviations (SDs) from the mean; (4) phenotype outliers were excluded by adjusting the raw phenotype (i.e., dfs) for age, number of surfaces, and the first 6 PCs of ancestry and excluding participants with adjusted phenotypes more than 3 SDs from the mean. The number of adjusted PCs sufficient to capture the population structure was determined based on the scatterplots and scree plots of PCs; (5) the adjusted phenotype was standardized to z scores with mean 0 and variance 1 in each sex group. Note, the phenotype processing steps not only removed the effects of age, number of surfaces and the first 6 PCs on the phenotype, but also the differences in mean and variance between the two sex groups. The workflow of this process and the number of excluded participants in each step are summarized in <xref ref-type="fig" rid="genes-2231568-f001">Figure 1</xref>.</p>
      </sec>
      <sec id="sec2dot4-genes-2231568">
        <title>2.4. Genome-Wide vQTL Scans and Meta-Analysis</title>
        <p>We used Levene&#x2019;s test with the median as implemented in OSCA software [<xref ref-type="bibr" rid="B14-genes-2231568">14</xref>] to test the associations between genetic variants with the variance of dfs in the three cohorts separately. After completing the individual genome-wide vQTL analyses in the three cohorts, we conducted Stouffer&#x2019;s <italic>p</italic>-value-based meta-analysis using the summary statistics from the three cohorts via METAL [<xref ref-type="bibr" rid="B15-genes-2231568">15</xref>] in order to increase statistical power. We set a threshold for genome-wide significance at <italic>p</italic> &lt; 5 &#xD7; 10<sup>&#x2212;8</sup> and for suggestive significance <italic>p</italic> &lt; 1 &#xD7; 10<sup>&#x2212;6</sup>. The results were summarized and visualized using Manhattan plots and quantile-quantile (Q-Q) plots created in R. We prioritized vQTLs with <italic>p</italic> &lt; 1 &#xD7; 10<sup>&#x2212;6</sup>, which were generated from three cohorts and meta-analysis of three cohorts, then used these prioritized vQTL in the following GEI analysis.</p>
      </sec>
      <sec id="sec2dot5-genes-2231568">
        <title>2.5. Environmental Factors</title>
        <p>In the following GEI analysis, we tested the interaction effects on dental caries in the primary dentition separately in the three cohorts using prioritized variants and environmental factors. For the environmental factors, we included available demographic, behavioral, and environmental factors that putatively relate to oral health across the three cohorts. The tested environmental factors were different across three cohorts.</p>
        <p>There were 14 factors tested in IFS including sex (male or female), annual household income (&lt;$20,000 or $20,000&#x2013;39,999 or &#x2265;$40,000), mother&#x2019;s educational attainment (up to high school or some college or above four-year degree), father&#x2019;s educational attainment (up to high school or some college or above four-year degree), water source (city/public or well), home water fluoride level (ppm, measured in a water sample), daily brushing frequency, birth weight (kg), gestational weeks at birth, daily milk intake (oz), daily 100% juice intake (oz), daily sugar-sweetened beverage (SSB) intake (oz), daily fluoride intake (mg), and daily powdered beverage intake (oz). In COHRA1, ten factors were tested including sex (male or female), recruitment site (Pennsylvania [PA] or West Virginia [WV]), annual mother&#x2019;s income (&lt;$15,000 or &#x2265;$15,000), annual father&#x2019;s income (&lt;$25,000 or &#x2265;$25,000), mother&#x2019;s educational attainment (&#x2264;high school or &gt;high school), father&#x2019;s educational attainment (&#x2264;high school or &gt;high school), water source (city/public or well), home water fluoride level (ppm), daily brushing frequency, and fluoride supplement (yes or no). In COHRA2, ten factors were tested including sex (male or female), recruitment site (PA or WV), annual mother&#x2019;s income (&lt;$25,000 or &#x2265;$25,000), home water source (city/public or well), home water fluoride level (ppm), mother&#x2019;s educational attainment (&lt;high school, high school or some college, or college degree and more), mother&#x2019;s tooth brushing frequency (&gt;1/day, 1/day, or &lt;1/day), breastfeeding history (yes or no), breastfeeding duration (months), and sugar-sweetened beverages intake (SSB, yes or no). We calculated the correlation coefficients (r) among the tested factors in the three cohorts separately and did not find any strong correlations (defined as r &gt; 0.8).</p>
      </sec>
      <sec id="sec2dot6-genes-2231568">
        <title>2.6. Genotype-by-Environment Interaction Analysis</title>
        <p>We used linear regression to test the interactions between the prioritized vQTLs and each of the environmental factors in the three cohorts separately. Environmental factors in each cohort were described above. The model for GEI analysis was:<disp-formula id="FD1-genes-2231568">
		<mml:math id="mm1" display="block">
		<mml:semantics>
		<mml:mrow>
		<mml:mi>y</mml:mi>
		<mml:mo>=</mml:mo>
		<mml:mi>&#x3BC;</mml:mi>
		<mml:mo>+</mml:mo>
		<mml:msub>
		<mml:mrow>
		<mml:mi>&#x3B2;</mml:mi>
		</mml:mrow>
		<mml:mrow>
		<mml:mi>G</mml:mi>
		</mml:mrow>
		</mml:msub>
		<mml:msub>
		<mml:mrow>
		<mml:mi>x</mml:mi>
		</mml:mrow>
		<mml:mrow>
		<mml:mi>G</mml:mi>
		</mml:mrow>
		</mml:msub>
		<mml:mo>+</mml:mo>
		<mml:msub>
		<mml:mrow>
		<mml:mi>&#x3B2;</mml:mi>
		</mml:mrow>
		<mml:mrow>
		<mml:mi>E</mml:mi>
		</mml:mrow>
		</mml:msub>
		<mml:msub>
		<mml:mrow>
		<mml:mi>x</mml:mi>
		</mml:mrow>
		<mml:mrow>
		<mml:mi>E</mml:mi>
		</mml:mrow>
		</mml:msub>
		<mml:mo>+</mml:mo>
		<mml:msub>
		<mml:mrow>
		<mml:mi>&#x3B2;</mml:mi>
		</mml:mrow>
		<mml:mrow>
		<mml:mi>G</mml:mi>
		<mml:mi>E</mml:mi>
		</mml:mrow>
		</mml:msub>
		<mml:msub>
		<mml:mrow>
		<mml:mi>x</mml:mi>
		</mml:mrow>
		<mml:mrow>
		<mml:mi>G</mml:mi>
		</mml:mrow>
		</mml:msub>
		<mml:msub>
		<mml:mrow>
		<mml:mi>x</mml:mi>
		</mml:mrow>
		<mml:mrow>
		<mml:mi>E</mml:mi>
		</mml:mrow>
		</mml:msub>
		<mml:mo>+</mml:mo>
		<mml:mi>e</mml:mi>
		</mml:mrow>
		</mml:semantics>
		</mml:math>
		</disp-formula>
        where <inline-formula>
          <mml:math id="mm2">
            <mml:semantics>
              <mml:mrow>
                <mml:mi>y</mml:mi>
              </mml:mrow>
            </mml:semantics>
          </mml:math>
        </inline-formula> is the standardized phenotype, <inline-formula>
          <mml:math id="mm3">
            <mml:semantics>
              <mml:mrow>
                <mml:mi>&#x3BC;</mml:mi>
              </mml:mrow>
            </mml:semantics>
          </mml:math>
        </inline-formula> is the mean term, <inline-formula>
          <mml:math id="mm4">
            <mml:semantics>
              <mml:mrow>
                <mml:msub>
                  <mml:mrow>
                    <mml:mi>x</mml:mi>
                  </mml:mrow>
                  <mml:mrow>
                    <mml:mi>G</mml:mi>
                  </mml:mrow>
                </mml:msub>
              </mml:mrow>
            </mml:semantics>
          </mml:math>
        </inline-formula> is the mean-centered SNP genotype, and <inline-formula>
          <mml:math id="mm5">
            <mml:semantics>
              <mml:mrow>
                <mml:msub>
                  <mml:mrow>
                    <mml:mi>x</mml:mi>
                  </mml:mrow>
                  <mml:mrow>
                    <mml:mi>E</mml:mi>
                  </mml:mrow>
                </mml:msub>
              </mml:mrow>
            </mml:semantics>
          </mml:math>
        </inline-formula> is the mean-centered environmental factor. The <inline-formula>
          <mml:math id="mm6">
            <mml:semantics>
              <mml:mrow>
                <mml:mi>&#x3B2;</mml:mi>
              </mml:mrow>
            </mml:semantics>
          </mml:math>
        </inline-formula>s are the coefficients for the genotype, the environmental factor, and the GEI, respectively. A stringent Bonferroni correction (i.e., 0.05 divided by the number of SNPs and the number of factors tested for GEI) was used to determine the significance thresholds for GEI effects, which were 9.16 &#xD7; 10<sup>&#x2212;5</sup> (i.e., 0.05/39 SNPs/14 factors) for IFS, 1.28 &#xD7; 10<sup>&#x2212;4</sup> (i.e., 0.05/39 SNPs/10 factors) for COHRA1 and 1.28 &#xD7; 10<sup>&#x2212;4</sup> (i.e., 0.05/39 SNPs/10 factors) for COHRA2.</p>
      </sec>
    </sec>
    <sec id="sec3-genes-2231568" sec-type="results">
      <title>3. Results</title>
      <sec id="sec3dot1-genes-2231568">
        <title>3.1. Sample Summary</title>
        <p>The summary of environmental factors in the three cohorts is listed in <xref ref-type="table" rid="genes-2231568-t001">Table 1</xref>. After applying quality filters for the participants, a total of 1497 children across the three cohorts were included in this analysis. There were six overlapping environmental factors across three cohorts including sex, parental education information, income information, home fluoride level, tooth brushing frequency, and water source. Other factors were cohort-specific.</p>
      </sec>
      <sec id="sec3dot2-genes-2231568">
        <title>3.2. Genome-Wide vQTL Scans and Meta-Analysis</title>
        <p>We conducted separate genome-wide vQTL scans of dfs in IFS, COHRA1, and COHRA2 using Levene&#x2019;s test and combined results across the three cohorts using meta-analysis. The Manhattan plots for the vQTL analysis of each cohort and the meta-analysis are shown in <xref ref-type="fig" rid="genes-2231568-f002">Figure 2</xref>. The genomic inflation factors were 1.00, 1.02, and 1.03 in IFS, COHRA1, and COHRA2, respectively, indicating there was no genomic inflation (<xref ref-type="app" rid="app1-genes-2231568">Figure S1</xref> shows the Q-Q plots for vQTL scans). There were three loci reaching the genome-wide significance threshold (<italic>p</italic> &lt; 5 &#xD7; 10<sup>&#x2212;8</sup>) in IFS, two loci in COHRA1, three loci in COHRA2, and two loci in the meta-analysis. In addition, there were eight signals at suggestive level (5 &#xD7; 10<sup>&#x2212;8</sup> &lt; <italic>p</italic> &lt; 1 &#xD7; 10<sup>&#x2212;6</sup>) in IFS, seven signals in COHRA1, 12 signals in COHRA2, and three signals in meta-analysis. In total there were 40 signals, 10 at the genome-wide significance threshold and 30 at the suggestive significance threshold. Notably, rs2090166 (the top SNP from COHRA2) and rs3862191 (from the meta-analysis) were in high linkage disequilibrium (r<sup>2</sup> = 0.98). Therefore, a total of 39 independent SNPs were used in the following GEI analysis. <xref ref-type="table" rid="genes-2231568-t002">Table 2</xref> lists results for the 40 top SNPs from the three cohorts and meta-analysis.</p>
      </sec>
      <sec id="sec3dot3-genes-2231568">
        <title>3.3. Genotype-by-Environment Interaction Analysis</title>
        <p>There were three significant GEI effects in IFS: rs9830884 with household income (<italic>p</italic> = 4.24 &#xD7; 10<sup>&#x2212;5</sup>), rs1491071 with father&#x2019;s educational attainment (<italic>p</italic> = 4.25 &#xD7; 10<sup>&#x2212;6</sup>), and rs1978471 with tooth brushing frequency (<italic>p</italic> = 3.15 &#xD7; 10<sup>&#x2212;5</sup>) (results for all 39 GEI in IFS are listed in <xref ref-type="app" rid="app1-genes-2231568">Table S1</xref>). <xref ref-type="fig" rid="genes-2231568-f003">Figure 3</xref> shows the form of the interactions between the SNPs and environmental factors. Children with the CC genotype of rs1491071 had higher standardized dfs than the CT and TT genotypes when their father&#x2019;s educational attainment was less than four years of college. Similarly, children with the TT genotype of rs1967471 exhibited higher dfs than the CT and CC genotypes when their tooth brushing frequency was less than two times a day and children with the CC genotype of rs9830883 had higher caries compared to the AC and CC genotypes when their household income was less than $40,000/year (<xref ref-type="fig" rid="genes-2231568-f003">Figure 3</xref>a&#x2013;c).</p>
        <p>There was one significant GEI in COHRA1, rs7463853 with father&#x2019;s income (<italic>p</italic> = 3.50 &#xD7; 10<sup>&#x2212;5</sup>) (results for all 39 GEI in COHRA1 were listed in <xref ref-type="app" rid="app1-genes-2231568">Table S2</xref>). Children with the GG genotype of rs7463853 had higher caries experience in the primary dentition compared to those with the AA and AG genotypes when their father&#x2019;s income was less than $25,000/year (<xref ref-type="fig" rid="genes-2231568-f003">Figure 3</xref>d).</p>
        <p>There were four significant GEI effects in COHRA2 including rs71508615 with sex (<italic>p</italic> = 6.78 &#xD7; 10<sup>&#x2212;6</sup>) and mother&#x2019;s income (<italic>p</italic> = 1.25 &#xD7; 10<sup>&#x2212;4</sup>), rs9685188 with breastfeeding status (<italic>p</italic> = 8.03 &#xD7; 10<sup>&#x2212;5</sup>), and rs73723358 with SSB (<italic>p</italic> = 7.39 &#xD7; 10<sup>&#x2212;5</sup>) (results for all GEI in COHRA2 were listed in <xref ref-type="app" rid="app1-genes-2231568">Table S3</xref>). Children with the GG genotype of rs71508615 exhibited higher standardized dfs than the AA and AG genotypes when their sex was female, and their mother&#x2019;s income was less than $25,000/year. Similarly, children with the TT genotype of rs9685188 had higher standardized dfs than the CT and CC genotypes when they were not breastfed and children with the GG genotype of rs73723358 experienced higher caries experience than the AG and AA genotypes when they had greater consumption of sugar-sweetened beverages (<xref ref-type="fig" rid="genes-2231568-f003">Figure 3</xref>e&#x2013;h).</p>
      </sec>
    </sec>
    <sec id="sec4-genes-2231568" sec-type="discussion">
      <title>4. Discussion</title>
      <p>This study explored genetic effects on the variance of dental caries experience and presented the application of genome-wide vQTL scans for prioritizing SNPs for GEI detection. The fact that the loci in this study were detected through vQTL scans (but not tests of the trait mean) indicates the unique value of studies focusing on phenotypic variance for studies of complex traits like dental caries. This is supported by the fact that only one of our discovered loci (<italic>NAMPT</italic>) was previously reported to be associated with caries in the permanent dentition. In addition, by using genome-wide vQTL scans to prioritize SNPs, we identified several significant GEI effects.</p>
      <p>The genome-wide vQTL scans of dental caries in the three separate cohorts and the meta-analysis of the three cohorts cumulatively identified 39 independent loci that were significantly associated with caries variance. The top SNPs from the 39 identified vQTL signals were used to test the GEI effects on dental caries in the primary dentition, yielding eight significant GEI in total across the three cohorts. Two of the SNPs from the eight significant GEI are in or near the genes that were reported to be involved in dental caries with relatively strong evidence in previous studies. First, the SNP rs73723358 identified as a possible vQTL at the suggestive level in COHRA2 is located near the gene <italic>NAMPT</italic> that was previously reported to be associated with dental caries in the permanent dentition [<xref ref-type="bibr" rid="B16-genes-2231568">16</xref>] in a Hispanic/Latino population. <italic>NAMPT</italic> is a pro-inflammatory adipokine that is expressed in periodontal tissue [<xref ref-type="bibr" rid="B17-genes-2231568">17</xref>] and is involved in periodontal healing and regulating matrix-degrading enzymes [<xref ref-type="bibr" rid="B18-genes-2231568">18</xref>]. Though the direct role of <italic>NAMPT</italic> in dental caries is not clear and rs73723358 does not have a known eQTL or regulatory effects on <italic>NAMPT</italic>, this SNP interacted with SSB intake influencing caries in the primary dentition in our study. Sugar in food and drinks is a well-known risk factor for dental caries [<xref ref-type="bibr" rid="B19-genes-2231568">19</xref>], which is used by bacteria as energy and increases the level of produced acids leading to a lower pH in the dental biofilm and demineralization. Children with the GG genotype of rs73723358 had higher caries experience compared to AG and AA only if they had higher SSB consumption, suggesting that the effect of the genetic variant rs73723358 on caries experience in the primary dentition was moderated by the consumption of SSB (and vice versa).</p>
      <p>Second, the SNP rs9685188 was identified as a vQTL from the meta-analysis of the three cohorts at a genome-wide significance level and is located near the gene <italic>IGFBP7</italic>, which encodes a member of the insulin-like growth factor-binding protein family. <italic>IGFBP7</italic> was found to be expressed in the whole cytoplasm of odontoblasts and the intercellular space of maturation-stage ameloblasts during tooth germ mineralization. Knock-down of <italic>IGFBP7</italic> expression in rats promoted dentin matrix mineralization suggesting the negative regulation of <italic>IGFBP7</italic> in enamel and dentin formation [<xref ref-type="bibr" rid="B20-genes-2231568">20</xref>]. Given the role of <italic>IGFBP7</italic> in tooth development and mineralization, it is plausible that <italic>IGFBP7</italic> impacts caries development through abnormal mineralization. In addition, this SNP influenced caries by significantly interacting with breastfeeding status in our study. Children with the TT genotype of rs9685188 had higher caries scores compared to CT and CC only if they were not breastfed. Breastfeeding is considered a protective factor for dental caries as the milk is released into the throat via breastfeeding, as opposed to bottle feeding, during which the milk is delivered into the front of the mouth and around the teeth. Our results suggest that the effects of <italic>IGFBP7</italic> on dental caries, potentially through its role in tooth development and mineralization, may be different between breastfed and non-breastfed children. However, the direct relationship between caries and this GEI is not clear yet.</p>
      <p>Our findings of the effects of GEI on dental caries provide additional insights into caries etiology. First, we identified vQTL signals that might represent novel caries susceptibility loci with effects that were not able to be detected by testing mean effects. Second, the nominated genes might play roles in the biology of dental caries, expanding the list of putatively caries-associated genes for further investigation. Third, the environmental factors interacting with genetic variants in dental caries expand our knowledge of cariogenesis and could potentially help with identifying genetic subgroups with higher exposure-specific caries risk for prevention efforts (i.e., increased environmental-specific risk for individuals with a certain genotype). For instance, socioeconomic status (SES) might influence caries risk through living conditions, behavior, and dietary patterns. Here, we also detected that SES indicators (e.g., income, education) significantly interacted with some of the genetic variants across all three cohorts. Our results indicated that people with lower SES might be more susceptible to dental caries when they carry a certain genotype. A similar scenario may play out for two other risk factors, tooth brushing frequency, and sex; people who brush their teeth less frequently and females experience higher caries risk when they have certain genotypes. Toothbrushing frequency has been reported to be associated with caries incidence and increment of carious lesions [<xref ref-type="bibr" rid="B21-genes-2231568">21</xref>]. However, we only recorded the tooth brushing frequency without the fluoride information on the toothpaste, so we cannot separate the effectiveness of fluoride toothpaste from toothbrushing frequency. Thus, the detailed mechanisms of these identified GEI in dental caries need to be further explored.</p>
      <p>In addition to the findings on GEI effects for dental caries, the vQTL scans, themselves, identified several signals located in or near genes with plausible biological roles in dental caries. For example, in the IFS cohort, the top SNP at the genome-wide significance level, rs59190052, has eQTL effects on nearby genes <italic>ANO4</italic> and <italic>UTP20</italic> and is located near the gene <italic>SLC5A8</italic>, which was reported to be expressed in ameloblasts at the maturation stage and directly involved in enamel mineralization [<xref ref-type="bibr" rid="B22-genes-2231568">22</xref>]. Abnormal <italic>SLC5A8</italic> expression disrupted ion and pH homeostasis and inhibited enamel crystal growth, which led to enamel hypomineralization and might contribute to the development of dental caries. In addition, <italic>SLC5A8</italic> has been shown to be expressed in epithelial cells and stimulate apoptosis, thus it may also promote apoptosis and autophagy of ameloblast during amelogenesis [<xref ref-type="bibr" rid="B23-genes-2231568">23</xref>]. Likewise, in COHRA1, the vQTL SNP rs11970843, which was identified at the suggestive level is located near the gene <italic>SHH</italic> and has putative regulatory effects on the enhancer of <italic>SHH</italic>, which encodes the Sonic Hedgehog signaling molecule. The Shh signaling pathway plays an essential role in human tooth development from initiation through to root development, which includes setting the boundaries between odontogenic and non-odontogenic epithelium at the initiation stage, and regulates cell cycle, differentiation, and morphogenesis at the stage of tooth germ establishment. Moreover, recent studies have shown that the Shh signaling pathway promotes morphogenetic movement via cell polarization, impacts both cuspal and root development at later stages, and defines tooth number at the maturation stage [<xref ref-type="bibr" rid="B24-genes-2231568">24</xref>]. However, the mechanisms of <italic>SHH</italic> in caries development are not clear and need to be investigated in the future. Another possible vQTL observed at the suggestive level in COHRA2, rs622516 is in the gene <italic>PKD2L1</italic> and has eQTL effects on <italic>PKD2L1</italic> in the testis, frontal cortex, and cortex tissues. <italic>PKD2L1</italic> encodes a member of the transient receptor potential family of ion channels and is a potential candidate gene for the sour taste that detects acids in foods and drinks, which may influence dietary patterns and potentially influence dental caries. Knockout <italic>PKD2L1</italic> in a mouse model reduces the responses of the gustatory nerve to sour taste stimuli [<xref ref-type="bibr" rid="B25-genes-2231568">25</xref>].</p>
      <p>There are several limitations of this study. The sample sizes are relatively small in the three cohorts, and even in the meta-analysis. SNPs with small effect sizes on dental caries variance might not have been detected due to low power. There were no overlapping vQTLs among the three cohorts (i.e., the identified loci in one cohort were not replicated in the other two cohorts even at nominal <italic>p</italic>-values), even with the same phenotype and similarly aged participants. This may also be a consequence of the low power problem. Another explanation is that the vQTL effects and GEI are cohort-specific. Participants were recruited from different regions in different decades and were exposed to different levels of environmental factors. Thus, the identified vQTL in one population may not be generalizable to other populations. Another limitation is that variance heterogeneity can be explained by multiple mechanisms including genuine interaction effects, confounding by phenotypic distribution, and induction by nearby causal variants. We are not able to fully explore all the potential mechanisms to inform our interpretations of the observed vQTLs. After prioritizing the SNPs via the vQTL scans, we only explored the GEI effects on dental caries. Genotype-by-genotype interactions can also lead to vQTLs, which is out of the scope of this study but is worth examining in the future. Another potential limitation is that for some of the vQTLs, we may not have collected data on the truly interacting environmental factor, hence, we were not able to detect the corresponding GEI for those vQTLs. Similarly, there were missing values for some of the environmental factors in COHRA1 (e.g., mother&#x2019;s and father&#x2019;s educational attainment) and an unbalanced number of participants in the strata of factors and genotypes in COHRA1 and COHRA2, which might cause problems in detecting the accurate effects of GEI on dental caries and replicating the GEI effects in other cohorts.</p>
    </sec>
    <sec id="sec5-genes-2231568" sec-type="conclusions">
      <title>5. Conclusions</title>
      <p>We conducted the first genome-wide vQTL scan of dental caries and identified 39 independent loci that were associated with caries variance at significant or suggestive levels. Some of the identified loci are in or near genes with possible functions in dental caries. Using these prioritized SNPs, we detected several environmental factors that significantly interacted with the vQTL SNPs to influence dental caries experience, including income, education, tooth brushing frequency, sex, breastfeeding, and SSB consumption. Our results expand the understanding of dental caries etiology.</p>
    </sec>
  </body>
  <back>
    <app-group>
      <app id="app1-genes-2231568">
        <title>Supplementary Materials</title>
        <p>The following supporting information can be downloaded at: <uri>www.mdpi.com/xxx/s1</uri>, Figure S1: Quantile-quantile plot for genome-wide vQTL analysis of dfs in IFS, COHRA1, and COHRA2; Table S1: <italic>p</italic> values of interactions between SNPs and factors associated with dfs in IFS; Table S2: <italic>p</italic> values of interactions between SNPs and factors associated with dfs in COHRA1; Table S3: <italic>p</italic> values of interactions between SNPs and factors associated with dfs in COHRA2.</p>
        <supplementary-material xmlns:xlink="http://www.w3.org/1999/xlink" id="genes-2231568-s001" xlink:href="genes-2231568-s001.zip"/>
      </app>
    </app-group>
    <notes>
      <title>Author Contributions</title>
      <p>Conceptualization, T.Z. and J.R.S.; methodology, T.Z. and J.R.S.; software, T.Z.; validation, T.Z. and J.R.S.; formal analysis, T.Z.; investigation, T.Z.; resources, B.F., D.W.M. and M.L.M.; data curation, T.Z.; writing&#x2014;original draft preparation, T.Z. and J.R.S.; writing&#x2014;review and editing, B.F., D.W.M., S.M.W. and M.L.M.; visualization, T.Z.; supervision, S.M.W. and J.R.S.; project administration, S.M.W., M.L.M. and J.R.S.; funding acquisition, S.M.W., M.L.M. and J.R.S. All authors have read and agreed to the published version of the manuscript.</p>
    </notes>
    <notes>
      <title>Institutional Review Board Statement</title>
      <p>The study was conducted in accordance with the Declaration of Helsinki and approved by the Institutional Review Board of University of Pittsburgh (coordinating center approval # 0207073, Pennsylvania site approval # 0506048) and West Virginia University (approval # 15620B).</p>
    </notes>
    <notes>
      <title>Informed Consent Statement</title>
      <p>Informed consent was obtained from all subjects&#x2019; parents involved in the study.</p>
    </notes>
    <notes>
      <title>Data Availability Statement</title>
      <p>The data presented in this study are available on request from the corresponding author. The data are not publicly available due to privacy.</p>
    </notes>
    <notes notes-type="COI-statement">
      <title>Conflicts of Interest</title>
      <p>The authors declare no conflict of interest.</p>
    </notes>
    <ref-list>
      <title>References</title>
      <ref id="B1-genes-2231568">
        <label>1.</label>
        <element-citation publication-type="journal">
          <person-group person-group-type="author">
            <name>
              <surname>Shaffer</surname>
              <given-names>J.R.</given-names>
            </name>
            <name>
              <surname>Carlson</surname>
              <given-names>J.C.</given-names>
            </name>
            <name>
              <surname>Stanley</surname>
              <given-names>B.O.</given-names>
            </name>
            <name>
              <surname>Feingold</surname>
              <given-names>E.</given-names>
            </name>
            <name>
              <surname>Cooper</surname>
              <given-names>M.</given-names>
            </name>
            <name>
              <surname>Vanyukov</surname>
              <given-names>M.M.</given-names>
            </name>
            <name>
              <surname>Maher</surname>
              <given-names>B.S.</given-names>
            </name>
            <name>
              <surname>Slayton</surname>
              <given-names>R.L.</given-names>
            </name>
            <name>
              <surname>Willing</surname>
              <given-names>M.C.</given-names>
            </name>
            <name>
              <surname>Reis</surname>
              <given-names>S.E.</given-names>
            </name>
            <etal/>
          </person-group>
          <article-title>Effects of enamel matrix genes on dental caries are moderated by fluoride exposures</article-title>
          <source>Hum. Genet.</source>
          <year>2015</year>
          <volume>134</volume>
          <fpage>159</fpage>
          <lpage>167</lpage>
          <pub-id pub-id-type="doi">10.1007/s00439-014-1504-7</pub-id>
        </element-citation>
      </ref>
      <ref id="B2-genes-2231568">
        <label>2.</label>
        <element-citation publication-type="journal">
          <person-group person-group-type="author">
            <name>
              <surname>Yildiz</surname>
              <given-names>G.</given-names>
            </name>
            <name>
              <surname>Ermis</surname>
              <given-names>R.B.</given-names>
            </name>
            <name>
              <surname>Calapoglu</surname>
              <given-names>N.S.</given-names>
            </name>
            <name>
              <surname>Celik</surname>
              <given-names>E.U.</given-names>
            </name>
            <name>
              <surname>Turel</surname>
              <given-names>G.Y.</given-names>
            </name>
          </person-group>
          <article-title>Gene-environment Interactions in the Etiology of Dental Caries</article-title>
          <source>J. Dent. Res.</source>
          <year>2016</year>
          <volume>95</volume>
          <fpage>74</fpage>
          <lpage>79</lpage>
          <pub-id pub-id-type="doi">10.1177/0022034515605281</pub-id>
        </element-citation>
      </ref>
      <ref id="B3-genes-2231568">
        <label>3.</label>
        <element-citation publication-type="journal">
          <person-group person-group-type="author">
            <name>
              <surname>Meng</surname>
              <given-names>Y.</given-names>
            </name>
            <name>
              <surname>Wu</surname>
              <given-names>T.</given-names>
            </name>
            <name>
              <surname>Billings</surname>
              <given-names>R.</given-names>
            </name>
            <name>
              <surname>Kopycka-Kedzierawski</surname>
              <given-names>D.T.</given-names>
            </name>
            <name>
              <surname>Xiao</surname>
              <given-names>J.</given-names>
            </name>
          </person-group>
          <article-title>Human genes influence the interaction between Streptococcus mutans and host caries susceptibility: A genome-wide association study in children with primary dentition</article-title>
          <source>Int. J. Oral Sci.</source>
          <year>2019</year>
          <volume>11</volume>
          <fpage>19</fpage>
          <pub-id pub-id-type="doi">10.1038/s41368-019-0051-4</pub-id>
        </element-citation>
      </ref>
      <ref id="B4-genes-2231568">
        <label>4.</label>
        <element-citation publication-type="journal">
          <person-group person-group-type="author">
            <name>
              <surname>Ronnegard</surname>
              <given-names>L.</given-names>
            </name>
            <name>
              <surname>Valdar</surname>
              <given-names>W.</given-names>
            </name>
          </person-group>
          <article-title>Recent developments in statistical methods for detecting genetic loci affecting phenotypic variability</article-title>
          <source>BMC Genet.</source>
          <year>2012</year>
          <volume>13</volume>
          <elocation-id>63</elocation-id>
          <pub-id pub-id-type="doi">10.1186/1471-2156-13-63</pub-id>
        </element-citation>
      </ref>
      <ref id="B5-genes-2231568">
        <label>5.</label>
        <element-citation publication-type="journal">
          <person-group person-group-type="author">
            <name>
              <surname>Marderstein</surname>
              <given-names>A.R.</given-names>
            </name>
            <name>
              <surname>Davenport</surname>
              <given-names>E.R.</given-names>
            </name>
            <name>
              <surname>Kulm</surname>
              <given-names>S.</given-names>
            </name>
            <name>
              <surname>Van Hout</surname>
              <given-names>C.V.</given-names>
            </name>
            <name>
              <surname>Elemento</surname>
              <given-names>O.</given-names>
            </name>
            <name>
              <surname>Clark</surname>
              <given-names>A.G.</given-names>
            </name>
          </person-group>
          <article-title>Leveraging phenotypic variability to identify genetic interactions in human phenotypes</article-title>
          <source>Am. J. Hum. Genet.</source>
          <year>2021</year>
          <volume>108</volume>
          <fpage>49</fpage>
          <lpage>67</lpage>
          <pub-id pub-id-type="doi">10.1016/j.ajhg.2020.11.016</pub-id>
        </element-citation>
      </ref>
      <ref id="B6-genes-2231568">
        <label>6.</label>
        <element-citation publication-type="journal">
          <person-group person-group-type="author">
            <name>
              <surname>Yang</surname>
              <given-names>J.</given-names>
            </name>
            <name>
              <surname>Loos</surname>
              <given-names>R.J.</given-names>
            </name>
            <name>
              <surname>Powell</surname>
              <given-names>J.E.</given-names>
            </name>
            <name>
              <surname>Medland</surname>
              <given-names>S.E.</given-names>
            </name>
            <name>
              <surname>Speliotes</surname>
              <given-names>E.K.</given-names>
            </name>
            <name>
              <surname>Chasman</surname>
              <given-names>D.I.</given-names>
            </name>
            <name>
              <surname>Rose</surname>
              <given-names>L.M.</given-names>
            </name>
            <name>
              <surname>Thorleifsson</surname>
              <given-names>G.</given-names>
            </name>
            <name>
              <surname>Steinthorsdottir</surname>
              <given-names>V.</given-names>
            </name>
            <name>
              <surname>Magi</surname>
              <given-names>R.</given-names>
            </name>
            <etal/>
          </person-group>
          <article-title>FTO genotype is associated with phenotypic variability of body mass index</article-title>
          <source>Nature</source>
          <year>2012</year>
          <volume>490</volume>
          <fpage>267</fpage>
          <lpage>272</lpage>
          <pub-id pub-id-type="doi">10.1038/nature11401</pub-id>
        </element-citation>
      </ref>
      <ref id="B7-genes-2231568">
        <label>7.</label>
        <element-citation publication-type="journal">
          <person-group person-group-type="author">
            <name>
              <surname>Neiswanger</surname>
              <given-names>K.</given-names>
            </name>
            <name>
              <surname>McNeil</surname>
              <given-names>D.W.</given-names>
            </name>
            <name>
              <surname>Foxman</surname>
              <given-names>B.</given-names>
            </name>
            <name>
              <surname>Govil</surname>
              <given-names>M.</given-names>
            </name>
            <name>
              <surname>Cooper</surname>
              <given-names>M.E.</given-names>
            </name>
            <name>
              <surname>Weyant</surname>
              <given-names>R.J.</given-names>
            </name>
            <name>
              <surname>Shaffer</surname>
              <given-names>J.R.</given-names>
            </name>
            <name>
              <surname>Crout</surname>
              <given-names>R.J.</given-names>
            </name>
            <name>
              <surname>Simhan</surname>
              <given-names>H.N.</given-names>
            </name>
            <name>
              <surname>Beach</surname>
              <given-names>S.R.</given-names>
            </name>
            <etal/>
          </person-group>
          <article-title>Oral Health in a Sample of Pregnant Women from Northern Appalachia (2011&#x2013;2015)</article-title>
          <source>Int. J. Dent.</source>
          <year>2015</year>
          <volume>2015</volume>
          <fpage>469376</fpage>
          <pub-id pub-id-type="doi">10.1155/2015/469376</pub-id>
        </element-citation>
      </ref>
      <ref id="B8-genes-2231568">
        <label>8.</label>
        <element-citation publication-type="journal">
          <person-group person-group-type="author">
            <name>
              <surname>Broffitt</surname>
              <given-names>B.</given-names>
            </name>
            <name>
              <surname>Levy</surname>
              <given-names>S.M.</given-names>
            </name>
            <name>
              <surname>Warren</surname>
              <given-names>J.</given-names>
            </name>
            <name>
              <surname>Cavanaugh</surname>
              <given-names>J.E.</given-names>
            </name>
          </person-group>
          <article-title>Factors associated with surface-level caries incidence in children aged 9 to 13: The Iowa Fluoride Study</article-title>
          <source>J. Public Health Dent.</source>
          <year>2013</year>
          <volume>73</volume>
          <fpage>304</fpage>
          <lpage>310</lpage>
          <pub-id pub-id-type="doi">10.1111/jphd.12028</pub-id>
        </element-citation>
      </ref>
      <ref id="B9-genes-2231568">
        <label>9.</label>
        <element-citation publication-type="journal">
          <person-group person-group-type="author">
            <name>
              <surname>Warren</surname>
              <given-names>J.J.</given-names>
            </name>
            <name>
              <surname>Levy</surname>
              <given-names>S.M.</given-names>
            </name>
            <name>
              <surname>Kanellis</surname>
              <given-names>M.J.</given-names>
            </name>
          </person-group>
          <article-title>Dental caries in the primary dentition: Assessing prevalence of cavitated and noncavitated lesions</article-title>
          <source>J. Public Health Dent.</source>
          <year>2002</year>
          <volume>62</volume>
          <fpage>109</fpage>
          <lpage>114</lpage>
          <pub-id pub-id-type="doi">10.1111/j.1752-7325.2002.tb03430.x</pub-id>
        </element-citation>
      </ref>
      <ref id="B10-genes-2231568">
        <label>10.</label>
        <element-citation publication-type="journal">
          <person-group person-group-type="author">
            <name>
              <surname>Chankanka</surname>
              <given-names>O.</given-names>
            </name>
            <name>
              <surname>Cavanaugh</surname>
              <given-names>J.E.</given-names>
            </name>
            <name>
              <surname>Levy</surname>
              <given-names>S.M.</given-names>
            </name>
            <name>
              <surname>Marshall</surname>
              <given-names>T.A.</given-names>
            </name>
            <name>
              <surname>Warren</surname>
              <given-names>J.J.</given-names>
            </name>
            <name>
              <surname>Broffitt</surname>
              <given-names>B.</given-names>
            </name>
            <name>
              <surname>Kolker</surname>
              <given-names>J.L.</given-names>
            </name>
          </person-group>
          <article-title>Longitudinal associations between children&#x2019;s dental caries and risk factors</article-title>
          <source>J. Public Health Dent.</source>
          <year>2011</year>
          <volume>71</volume>
          <fpage>289</fpage>
          <lpage>300</lpage>
          <pub-id pub-id-type="doi">10.1111/j.1752-7325.2011.00271.x</pub-id>
        </element-citation>
      </ref>
      <ref id="B11-genes-2231568">
        <label>11.</label>
        <element-citation publication-type="journal">
          <person-group person-group-type="author">
            <name>
              <surname>Polk</surname>
              <given-names>D.E.</given-names>
            </name>
            <name>
              <surname>Weyant</surname>
              <given-names>R.J.</given-names>
            </name>
            <name>
              <surname>Crout</surname>
              <given-names>R.J.</given-names>
            </name>
            <name>
              <surname>McNeil</surname>
              <given-names>D.W.</given-names>
            </name>
            <name>
              <surname>Tarter</surname>
              <given-names>R.E.</given-names>
            </name>
            <name>
              <surname>Thomas</surname>
              <given-names>J.G.</given-names>
            </name>
            <name>
              <surname>Marazita</surname>
              <given-names>M.L.</given-names>
            </name>
          </person-group>
          <article-title>Study protocol of the Center for Oral Health Research in Appalachia (COHRA) etiology study</article-title>
          <source>BMC Oral Health</source>
          <year>2008</year>
          <volume>8</volume>
          <elocation-id>18</elocation-id>
          <pub-id pub-id-type="doi">10.1186/1472-6831-8-18</pub-id>
        </element-citation>
      </ref>
      <ref id="B12-genes-2231568">
        <label>12.</label>
        <element-citation publication-type="journal">
          <person-group person-group-type="author">
            <name>
              <surname>Das</surname>
              <given-names>S.</given-names>
            </name>
            <name>
              <surname>Forer</surname>
              <given-names>L.</given-names>
            </name>
            <name>
              <surname>Schonherr</surname>
              <given-names>S.</given-names>
            </name>
            <name>
              <surname>Sidore</surname>
              <given-names>C.</given-names>
            </name>
            <name>
              <surname>Locke</surname>
              <given-names>A.E.</given-names>
            </name>
            <name>
              <surname>Kwong</surname>
              <given-names>A.</given-names>
            </name>
            <name>
              <surname>Vrieze</surname>
              <given-names>S.I.</given-names>
            </name>
            <name>
              <surname>Chew</surname>
              <given-names>E.Y.</given-names>
            </name>
            <name>
              <surname>Levy</surname>
              <given-names>S.</given-names>
            </name>
            <name>
              <surname>McGue</surname>
              <given-names>M.</given-names>
            </name>
            <etal/>
          </person-group>
          <article-title>Next-generation genotype imputation service and methods</article-title>
          <source>Nat. Genet.</source>
          <year>2016</year>
          <volume>48</volume>
          <fpage>1284</fpage>
          <lpage>1287</lpage>
          <pub-id pub-id-type="doi">10.1038/ng.3656</pub-id>
        </element-citation>
      </ref>
      <ref id="B13-genes-2231568">
        <label>13.</label>
        <element-citation publication-type="journal">
          <person-group person-group-type="author">
            <name>
              <surname>McCarthy</surname>
              <given-names>S.</given-names>
            </name>
            <name>
              <surname>Das</surname>
              <given-names>S.</given-names>
            </name>
            <name>
              <surname>Kretzschmar</surname>
              <given-names>W.</given-names>
            </name>
            <name>
              <surname>Delaneau</surname>
              <given-names>O.</given-names>
            </name>
            <name>
              <surname>Wood</surname>
              <given-names>A.R.</given-names>
            </name>
            <name>
              <surname>Teumer</surname>
              <given-names>A.</given-names>
            </name>
            <name>
              <surname>Kang</surname>
              <given-names>H.M.</given-names>
            </name>
            <name>
              <surname>Fuchsberger</surname>
              <given-names>C.</given-names>
            </name>
            <name>
              <surname>Danecek</surname>
              <given-names>P.</given-names>
            </name>
            <name>
              <surname>Sharp</surname>
              <given-names>K.</given-names>
            </name>
            <etal/>
          </person-group>
          <article-title>A reference panel of 64,976 haplotypes for genotype imputation</article-title>
          <source>Nat. Genet.</source>
          <year>2016</year>
          <volume>48</volume>
          <fpage>1279</fpage>
          <lpage>1283</lpage>
          <pub-id pub-id-type="doi">10.1038/ng.3643</pub-id>
        </element-citation>
      </ref>
      <ref id="B14-genes-2231568">
        <label>14.</label>
        <element-citation publication-type="journal">
          <person-group person-group-type="author">
            <name>
              <surname>Zhang</surname>
              <given-names>F.</given-names>
            </name>
            <name>
              <surname>Chen</surname>
              <given-names>W.</given-names>
            </name>
            <name>
              <surname>Zhu</surname>
              <given-names>Z.</given-names>
            </name>
            <name>
              <surname>Zhang</surname>
              <given-names>Q.</given-names>
            </name>
            <name>
              <surname>Nabais</surname>
              <given-names>M.F.</given-names>
            </name>
            <name>
              <surname>Qi</surname>
              <given-names>T.</given-names>
            </name>
            <name>
              <surname>Deary</surname>
              <given-names>I.J.</given-names>
            </name>
            <name>
              <surname>Wray</surname>
              <given-names>N.R.</given-names>
            </name>
            <name>
              <surname>Visscher</surname>
              <given-names>P.M.</given-names>
            </name>
            <name>
              <surname>McRae</surname>
              <given-names>A.F.</given-names>
            </name>
            <etal/>
          </person-group>
          <article-title>OSCA: A tool for omic-data-based complex trait analysis</article-title>
          <source>Genome Biol.</source>
          <year>2019</year>
          <volume>20</volume>
          <fpage>107</fpage>
          <pub-id pub-id-type="doi">10.1186/s13059-019-1718-z</pub-id>
        </element-citation>
      </ref>
      <ref id="B15-genes-2231568">
        <label>15.</label>
        <element-citation publication-type="journal">
          <person-group person-group-type="author">
            <name>
              <surname>Willer</surname>
              <given-names>C.J.</given-names>
            </name>
            <name>
              <surname>Li</surname>
              <given-names>Y.</given-names>
            </name>
            <name>
              <surname>Abecasis</surname>
              <given-names>G.R.</given-names>
            </name>
          </person-group>
          <article-title>METAL: Fast and efficient meta-analysis of genomewide association scans</article-title>
          <source>Bioinformatics</source>
          <year>2010</year>
          <volume>26</volume>
          <fpage>2190</fpage>
          <lpage>2191</lpage>
          <pub-id pub-id-type="doi">10.1093/bioinformatics/btq340</pub-id>
        </element-citation>
      </ref>
      <ref id="B16-genes-2231568">
        <label>16.</label>
        <element-citation publication-type="journal">
          <person-group person-group-type="author">
            <name>
              <surname>Morrison</surname>
              <given-names>J.</given-names>
            </name>
            <name>
              <surname>Laurie</surname>
              <given-names>C.C.</given-names>
            </name>
            <name>
              <surname>Marazita</surname>
              <given-names>M.L.</given-names>
            </name>
            <name>
              <surname>Sanders</surname>
              <given-names>A.E.</given-names>
            </name>
            <name>
              <surname>Offenbacher</surname>
              <given-names>S.</given-names>
            </name>
            <name>
              <surname>Salazar</surname>
              <given-names>C.R.</given-names>
            </name>
            <name>
              <surname>Conomos</surname>
              <given-names>M.P.</given-names>
            </name>
            <name>
              <surname>Thornton</surname>
              <given-names>T.</given-names>
            </name>
            <name>
              <surname>Jain</surname>
              <given-names>D.</given-names>
            </name>
            <name>
              <surname>Laurie</surname>
              <given-names>C.A.</given-names>
            </name>
            <etal/>
          </person-group>
          <article-title>Genome-wide association study of dental caries in the Hispanic Communities Health Study/Study of Latinos (HCHS/SOL)</article-title>
          <source>Hum. Mol. Genet.</source>
          <year>2016</year>
          <volume>25</volume>
          <fpage>807</fpage>
          <lpage>816</lpage>
          <pub-id pub-id-type="doi">10.1093/hmg/ddv506</pub-id>
        </element-citation>
      </ref>
      <ref id="B17-genes-2231568">
        <label>17.</label>
        <element-citation publication-type="journal">
          <person-group person-group-type="author">
            <name>
              <surname>Damanaki</surname>
              <given-names>A.</given-names>
            </name>
            <name>
              <surname>Nokhbehsaim</surname>
              <given-names>M.</given-names>
            </name>
            <name>
              <surname>Eick</surname>
              <given-names>S.</given-names>
            </name>
            <name>
              <surname>Gotz</surname>
              <given-names>W.</given-names>
            </name>
            <name>
              <surname>Winter</surname>
              <given-names>J.</given-names>
            </name>
            <name>
              <surname>Wahl</surname>
              <given-names>G.</given-names>
            </name>
            <name>
              <surname>Jager</surname>
              <given-names>A.</given-names>
            </name>
            <name>
              <surname>Jepsen</surname>
              <given-names>S.</given-names>
            </name>
            <name>
              <surname>Deschner</surname>
              <given-names>J.</given-names>
            </name>
          </person-group>
          <article-title>Regulation of NAMPT in human gingival fibroblasts and biopsies</article-title>
          <source>Mediat. Inflamm.</source>
          <year>2014</year>
          <volume>2014</volume>
          <fpage>912821</fpage>
          <pub-id pub-id-type="doi">10.1155/2014/912821</pub-id>
        </element-citation>
      </ref>
      <ref id="B18-genes-2231568">
        <label>18.</label>
        <element-citation publication-type="journal">
          <person-group person-group-type="author">
            <name>
              <surname>Yang</surname>
              <given-names>S.</given-names>
            </name>
            <name>
              <surname>Ryu</surname>
              <given-names>J.H.</given-names>
            </name>
            <name>
              <surname>Oh</surname>
              <given-names>H.</given-names>
            </name>
            <name>
              <surname>Jeon</surname>
              <given-names>J.</given-names>
            </name>
            <name>
              <surname>Kwak</surname>
              <given-names>J.S.</given-names>
            </name>
            <name>
              <surname>Kim</surname>
              <given-names>J.H.</given-names>
            </name>
            <name>
              <surname>Kim</surname>
              <given-names>H.A.</given-names>
            </name>
            <name>
              <surname>Chun</surname>
              <given-names>C.H.</given-names>
            </name>
            <name>
              <surname>Chun</surname>
              <given-names>J.S.</given-names>
            </name>
          </person-group>
          <article-title>NAMPT (visfatin), a direct target of hypoxia-inducible factor-2alpha, is an essential catabolic regulator of osteoarthritis</article-title>
          <source>Ann. Rheum. Dis.</source>
          <year>2015</year>
          <volume>74</volume>
          <fpage>595</fpage>
          <lpage>602</lpage>
          <pub-id pub-id-type="doi">10.1136/annrheumdis-2013-204355</pub-id>
        </element-citation>
      </ref>
      <ref id="B19-genes-2231568">
        <label>19.</label>
        <element-citation publication-type="journal">
          <person-group person-group-type="author">
            <name>
              <surname>Lula</surname>
              <given-names>E.C.</given-names>
            </name>
            <name>
              <surname>Ribeiro</surname>
              <given-names>C.C.</given-names>
            </name>
            <name>
              <surname>Hugo</surname>
              <given-names>F.N.</given-names>
            </name>
            <name>
              <surname>Alves</surname>
              <given-names>C.M.</given-names>
            </name>
            <name>
              <surname>Silva</surname>
              <given-names>A.A.</given-names>
            </name>
          </person-group>
          <article-title>Added sugars and periodontal disease in young adults: An analysis of NHANES III data</article-title>
          <source>Am. J. Clin. Nutr.</source>
          <year>2014</year>
          <volume>100</volume>
          <fpage>1182</fpage>
          <lpage>1187</lpage>
          <pub-id pub-id-type="doi">10.3945/ajcn.114.089656</pub-id>
        </element-citation>
      </ref>
      <ref id="B20-genes-2231568">
        <label>20.</label>
        <element-citation publication-type="journal">
          <person-group person-group-type="author">
            <name>
              <surname>Moon</surname>
              <given-names>J.S.</given-names>
            </name>
            <name>
              <surname>Nam</surname>
              <given-names>Y.S.</given-names>
            </name>
            <name>
              <surname>Kang</surname>
              <given-names>J.H.</given-names>
            </name>
            <name>
              <surname>Yang</surname>
              <given-names>D.W.</given-names>
            </name>
            <name>
              <surname>Kim</surname>
              <given-names>D.Y.</given-names>
            </name>
            <name>
              <surname>Lee</surname>
              <given-names>S.Y.</given-names>
            </name>
            <name>
              <surname>Ko</surname>
              <given-names>H.M.</given-names>
            </name>
            <name>
              <surname>Kim</surname>
              <given-names>M.S.</given-names>
            </name>
            <name>
              <surname>Kim</surname>
              <given-names>S.H.</given-names>
            </name>
          </person-group>
          <article-title>Regulatory role of insulin-like growth factor-binding proteins in odontogenic mineralization in rats</article-title>
          <source>J. Mol. Histol.</source>
          <year>2021</year>
          <volume>52</volume>
          <fpage>63</fpage>
          <lpage>75</lpage>
          <pub-id pub-id-type="doi">10.1007/s10735-020-09923-3</pub-id>
        </element-citation>
      </ref>
      <ref id="B21-genes-2231568">
        <label>21.</label>
        <element-citation publication-type="journal">
          <person-group person-group-type="author">
            <name>
              <surname>Kumar</surname>
              <given-names>S.</given-names>
            </name>
            <name>
              <surname>Tadakamadla</surname>
              <given-names>J.</given-names>
            </name>
            <name>
              <surname>Johnson</surname>
              <given-names>N.W.</given-names>
            </name>
          </person-group>
          <article-title>Effect of Toothbrushing Frequency on Incidence and Increment of Dental Caries: A Systematic Review and Meta-Analysis</article-title>
          <source>J. Dent. Res.</source>
          <year>2016</year>
          <volume>95</volume>
          <fpage>1230</fpage>
          <lpage>1236</lpage>
          <pub-id pub-id-type="doi">10.1177/0022034516655315</pub-id>
        </element-citation>
      </ref>
      <ref id="B22-genes-2231568">
        <label>22.</label>
        <element-citation publication-type="journal">
          <person-group person-group-type="author">
            <name>
              <surname>Jedeon</surname>
              <given-names>K.</given-names>
            </name>
            <name>
              <surname>Loiodice</surname>
              <given-names>S.</given-names>
            </name>
            <name>
              <surname>Salhi</surname>
              <given-names>K.</given-names>
            </name>
            <name>
              <surname>Le Normand</surname>
              <given-names>M.</given-names>
            </name>
            <name>
              <surname>Houari</surname>
              <given-names>S.</given-names>
            </name>
            <name>
              <surname>Chaloyard</surname>
              <given-names>J.</given-names>
            </name>
            <name>
              <surname>Berdal</surname>
              <given-names>A.</given-names>
            </name>
            <name>
              <surname>Babajko</surname>
              <given-names>S.</given-names>
            </name>
          </person-group>
          <article-title>Androgen Receptor Involvement in Rat Amelogenesis: An Additional Way for Endocrine-Disrupting Chemicals to Affect Enamel Synthesis</article-title>
          <source>Endocrinology</source>
          <year>2016</year>
          <volume>157</volume>
          <fpage>4287</fpage>
          <lpage>4296</lpage>
          <pub-id pub-id-type="doi">10.1210/en.2016-1342</pub-id>
          <pub-id pub-id-type="pmid">27684650</pub-id>
        </element-citation>
      </ref>
      <ref id="B23-genes-2231568">
        <label>23.</label>
        <element-citation publication-type="journal">
          <person-group person-group-type="author">
            <name>
              <surname>Jedeon</surname>
              <given-names>K.</given-names>
            </name>
            <name>
              <surname>Houari</surname>
              <given-names>S.</given-names>
            </name>
            <name>
              <surname>Loiodice</surname>
              <given-names>S.</given-names>
            </name>
            <name>
              <surname>Thuy</surname>
              <given-names>T.T.</given-names>
            </name>
            <name>
              <surname>Le Normand</surname>
              <given-names>M.</given-names>
            </name>
            <name>
              <surname>Berdal</surname>
              <given-names>A.</given-names>
            </name>
            <name>
              <surname>Babajko</surname>
              <given-names>S.</given-names>
            </name>
          </person-group>
          <article-title>Chronic Exposure to Bisphenol a Exacerbates Dental Fluorosis in Growing Rats</article-title>
          <source>J. Bone Miner. Res.</source>
          <year>2016</year>
          <volume>31</volume>
          <fpage>1955</fpage>
          <lpage>1966</lpage>
          <pub-id pub-id-type="doi">10.1002/jbmr.2879</pub-id>
          <pub-id pub-id-type="pmid">27257137</pub-id>
        </element-citation>
      </ref>
      <ref id="B24-genes-2231568">
        <label>24.</label>
        <element-citation publication-type="journal">
          <person-group person-group-type="author">
            <name>
              <surname>Hosoya</surname>
              <given-names>A.</given-names>
            </name>
            <name>
              <surname>Shalehin</surname>
              <given-names>N.</given-names>
            </name>
            <name>
              <surname>Takebe</surname>
              <given-names>H.</given-names>
            </name>
            <name>
              <surname>Shimo</surname>
              <given-names>T.</given-names>
            </name>
            <name>
              <surname>Irie</surname>
              <given-names>K.</given-names>
            </name>
          </person-group>
          <article-title>Sonic Hedgehog Signaling and Tooth Development</article-title>
          <source>Int. J. Mol. Sci.</source>
          <year>2020</year>
          <volume>21</volume>
          <elocation-id>1587</elocation-id>
          <pub-id pub-id-type="doi">10.3390/ijms21051587</pub-id>
          <pub-id pub-id-type="pmid">32111038</pub-id>
        </element-citation>
      </ref>
      <ref id="B25-genes-2231568">
        <label>25.</label>
        <element-citation publication-type="journal">
          <person-group person-group-type="author">
            <name>
              <surname>Horio</surname>
              <given-names>N.</given-names>
            </name>
            <name>
              <surname>Yoshida</surname>
              <given-names>R.</given-names>
            </name>
            <name>
              <surname>Yasumatsu</surname>
              <given-names>K.</given-names>
            </name>
            <name>
              <surname>Yanagawa</surname>
              <given-names>Y.</given-names>
            </name>
            <name>
              <surname>Ishimaru</surname>
              <given-names>Y.</given-names>
            </name>
            <name>
              <surname>Matsunami</surname>
              <given-names>H.</given-names>
            </name>
            <name>
              <surname>Ninomiya</surname>
              <given-names>Y.</given-names>
            </name>
          </person-group>
          <article-title>Sour taste responses in mice lacking PKD channels</article-title>
          <source>PLoS ONE</source>
          <year>2011</year>
          <volume>6</volume>
          <elocation-id>e20007</elocation-id>
          <pub-id pub-id-type="doi">10.1371/journal.pone.0020007</pub-id>
        </element-citation>
      </ref>
    </ref-list>
    <sec sec-type="display-objects">
      <title>Figures and Tables</title>
      <fig id="genes-2231568-f001" position="float">
        <label>Figure 1</label>
        <caption>
          <p>Participant process workflow.</p>
        </caption>
        <graphic xmlns:xlink="http://www.w3.org/1999/xlink" xlink:href="genes-2231568-g001.tif"/>
      </fig>
      <fig id="genes-2231568-f002" position="float">
        <label>Figure 2</label>
        <caption>
          <p>Manhattan plot for genome-wide vQTL scans of dfs in IFS, COHRA1, COHRA2, and meta-analysis; &#x2212;log<sub>10</sub>-transformed <italic>p</italic>-values (y-axis) for each SNP organized by physical position across the chromosomes (x-axis) are shown. Horizontal lines represent the genome-wide significant (5 &#xD7; 10<sup>&#x2212;8</sup>) and suggestive (1 &#xD7; 10<sup>&#x2212;6</sup>) <italic>p</italic>-value thresholds.</p>
        </caption>
        <graphic xmlns:xlink="http://www.w3.org/1999/xlink" xlink:href="genes-2231568-g002.tif"/>
      </fig>
      <fig id="genes-2231568-f003" position="float">
        <label>Figure 3</label>
        <caption>
          <p>Interaction plots for significant GEI across three cohorts. In IFS, (<bold>a</bold>) rs1491071 with father&#x2019;s educational attainment, CC genotype had higher dfs when father&#x2019;s educational attainment &lt; Four&#x2212;year college; (<bold>b</bold>) rs1978471 with toothbrushing frequency, TT genotype had higher dfs when toothbrushing frequency &lt; 2 times per day; (<bold>c</bold>) rs9830884 with household income, CC genotype had higher dfs when household income &lt; 40,000 per year; In COHRA1, (<bold>d</bold>) rs7463853 with father&#x2019;s income, GG genotype had higher dfs when father&#x2019;s income &lt; 25,000 per year; In COHRA2, (<bold>e</bold>) rs71508615 with sex, GG genotype had higher dfs when sex was female; (<bold>f</bold>) rs71508615 with mother&#x2019;s income, GG genotype had higher dfs when mother&#x2019;s income &lt; 25,000 per year; (<bold>g</bold>) rs9685188 with breastfeeding status, TT genotype had higher dfs when breastfed; (<bold>h</bold>) rs73723358 with SSB, GG genotype had higher dfs when intaking SSB.</p>
        </caption>
        <graphic xmlns:xlink="http://www.w3.org/1999/xlink" xlink:href="genes-2231568-g003a.tif"/>
        <graphic xmlns:xlink="http://www.w3.org/1999/xlink" xlink:href="genes-2231568-g003b.tif"/>
      </fig>
      <table-wrap id="genes-2231568-t001" position="float">
        <object-id pub-id-type="pii">genes-2231568-t001_Table 1</object-id>
        <label>Table 1</label>
        <caption>
          <p>Basic characteristics of study samples in IFS, COHRA1, and COHRA2.</p>
        </caption>
        <table>
          <thead>
            <tr>
              <th align="center" valign="middle" style="border-top:solid thin;border-bottom:solid thin">Variables</th>
              <th align="center" valign="middle" style="border-top:solid thin;border-bottom:solid thin">IFS (n = 396)</th>
              <th align="center" valign="middle" style="border-top:solid thin;border-bottom:solid thin">COHRA1 (n = 328)</th>
              <th align="center" valign="middle" style="border-top:solid thin;border-bottom:solid thin">COHRA2 (n = 773)</th>
            </tr>
          </thead>
          <tbody>
            <tr>
              <td align="center" valign="middle">Decayed and filled surfaces (dfs)</td>
              <td align="center" valign="middle">1.36 &#xB1; 2.81</td>
              <td align="center" valign="middle">1.47 &#xB1; 3.22</td>
              <td align="center" valign="middle">0.68 &#xB1; 2.04</td>
            </tr>
            <tr>
              <td align="center" valign="middle">Age at examination</td>
              <td align="center" valign="middle">5.14 &#xB1; 0.41</td>
              <td align="center" valign="middle">3.53 &#xB1; 1.52</td>
              <td align="center" valign="middle">3.69 &#xB1; 1.40</td>
            </tr>
            <tr>
              <td align="center" valign="middle">Sex (Male vs. Female)</td>
              <td align="center" valign="middle">189/207</td>
              <td align="center" valign="middle">166/162</td>
              <td align="center" valign="middle">405/368</td>
            </tr>
            <tr>
              <td align="center" valign="middle">Site (PA vs. WV)</td>
              <td align="center" valign="middle">NA</td>
              <td align="center" valign="middle">94/234</td>
              <td align="center" valign="middle">437/336</td>
            </tr>
            <tr>
              <td align="center" valign="middle">Mother&#x2019;s educational attainment</td>
              <td align="center" valign="middle">&lt;4-year college: 215<break/>&#x2265;4-year college: 181</td>
              <td align="center" valign="middle">&#x2264;high school: 133<break/>&gt;high school: 113</td>
              <td align="center" valign="middle">&lt;4-year college: 336<break/>&#x2265;4-year college: 434</td>
            </tr>
            <tr>
              <td align="center" valign="middle">Father&#x2019;s educational attainment</td>
              <td align="center" valign="middle">&lt;4-year college: 214<break/>&#x2265;4-year college: 169</td>
              <td align="center" valign="middle">&#x2264;high school: 90<break/>&gt;high school: 59</td>
              <td align="center" valign="middle">NA</td>
            </tr>
            <tr>
              <td align="center" valign="middle">Mother&#x2019;s income</td>
              <td align="center" valign="middle">NA</td>
              <td align="center" valign="middle">&lt;$15,000: 108 <break/>&#x2265;$15,000: 68</td>
              <td align="center" valign="middle">&lt;$25,000: 422<break/>&#x2265;$25,000: 339</td>
            </tr>
            <tr>
              <td align="center" valign="middle">Father&#x2019;s income</td>
              <td align="center" valign="middle">NA</td>
              <td align="center" valign="middle">&lt;$25,000: 62 <break/>&#x2265;$25,000: 72</td>
              <td align="center" valign="middle">NA</td>
            </tr>
            <tr>
              <td align="center" valign="middle">Household Income</td>
              <td align="center" valign="middle">&lt;$40,000: 185<break/>&#x2265;$40,000: 196</td>
              <td align="center" valign="middle">NA</td>
              <td align="center" valign="middle">NA</td>
            </tr>
            <tr>
              <td align="center" valign="middle">Home fluoride level (ppm)</td>
              <td align="center" valign="middle">0.80 &#xB1; 0.40</td>
              <td align="center" valign="middle">0.66 &#xB1; 0.43</td>
              <td align="center" valign="middle">0.78 &#xB1; 0.29</td>
            </tr>
            <tr>
              <td align="center" valign="middle">Brushing frequency (&#x2265;2/day vs. &lt;2/day)</td>
              <td align="center" valign="middle">205/175</td>
              <td align="center" valign="middle">176/124</td>
              <td align="center" valign="middle">594/76</td>
            </tr>
            <tr>
              <td align="center" valign="middle">Water source (city/public vs. well)</td>
              <td align="center" valign="middle">297/85</td>
              <td align="center" valign="middle">249/62</td>
              <td align="center" valign="middle">661/40</td>
            </tr>
            <tr>
              <td align="center" valign="middle">Birth weight (kg)</td>
              <td align="center" valign="middle">3.50 &#xB1; 0.58</td>
              <td align="center" valign="middle">NA</td>
              <td align="center" valign="middle">NA</td>
            </tr>
            <tr>
              <td align="center" valign="middle">Gestational weeks</td>
              <td align="center" valign="middle">39.40 &#xB1; 2.10</td>
              <td align="center" valign="middle">NA</td>
              <td align="center" valign="middle">NA</td>
            </tr>
            <tr>
              <td align="center" valign="middle">Daily milk intake (oz)</td>
              <td align="center" valign="middle">13.00 &#xB1; 6.10</td>
              <td align="center" valign="middle">NA</td>
              <td align="center" valign="middle">NA</td>
            </tr>
            <tr>
              <td align="center" valign="middle">Daily 100% juice intake (oz)</td>
              <td align="center" valign="middle">5.72 &#xB1; 4.17</td>
              <td align="center" valign="middle">NA</td>
              <td align="center" valign="middle">NA</td>
            </tr>
            <tr>
              <td align="center" valign="middle">Daily SSB intake (oz)</td>
              <td align="center" valign="middle">4.83 &#xB1; 3.92</td>
              <td align="center" valign="middle">NA</td>
              <td align="center" valign="middle">NA</td>
            </tr>
            <tr>
              <td align="center" valign="middle">Daily fluoride intake (oz)</td>
              <td align="center" valign="middle">0.71 &#xB1; 0.35</td>
              <td align="center" valign="middle">NA</td>
              <td align="center" valign="middle">NA</td>
            </tr>
            <tr>
              <td align="center" valign="middle">Daily powdered beverage intake (oz)</td>
              <td align="center" valign="middle">1.37 &#xB1; 3.70</td>
              <td align="center" valign="middle">NA</td>
              <td align="center" valign="middle">NA</td>
            </tr>
            <tr>
              <td align="center" valign="middle">Breastfeeding duration (months)</td>
              <td align="center" valign="middle">NA</td>
              <td align="center" valign="middle">NA</td>
              <td align="center" valign="middle">3.92 &#xB1; 5.61</td>
            </tr>
            <tr>
              <td align="center" valign="middle">Breastfeeding status<break/>(Yes vs. No)</td>
              <td align="center" valign="middle">NA</td>
              <td align="center" valign="middle">NA</td>
              <td align="center" valign="middle">643/106</td>
            </tr>
            <tr>
              <td align="center" valign="middle" style="border-bottom:solid thin">SSB intake </td>
              <td align="center" valign="middle" style="border-bottom:solid thin">NA</td>
              <td align="center" valign="middle" style="border-bottom:solid thin">NA</td>
              <td align="center" valign="middle" style="border-bottom:solid thin">No: 460<break/>Yes: 313</td>
            </tr>
          </tbody>
        </table>
        <table-wrap-foot>
          <fn>
            <p>Note: IFS: Iowa Fluoride Study; COHRA1: Center for Oral Health Research in Appalachia, cohort 1; COHRA2: Center for Oral Health Research in Appalachia, cohort 2; PA: Pennsylvania; WV: West Virginia. SSB: sugar-sweetened beverages. For categorical variables, showing the number of participants in each group; for numeric variables, showing the mean &#xB1; standard deviation. NA: not available in the cohort.</p>
          </fn>
        </table-wrap-foot>
      </table-wrap>
      <table-wrap id="genes-2231568-t002" position="float">
        <object-id pub-id-type="pii">genes-2231568-t002_Table 2</object-id>
        <label>Table 2</label>
        <caption>
          <p>40 prioritized SNPs (<italic>p</italic> &lt; 1 &#xD7; 10<sup>&#x2212;6</sup>) from vQTL of dfs in IFS, COHRA1, COHRA2, and meta-analysis.</p>
        </caption>
        <table>
          <thead>
            <tr>
              <th align="center" valign="middle" style="border-top:solid thin;border-bottom:solid thin">No</th>
              <th align="center" valign="middle" style="border-top:solid thin;border-bottom:solid thin">SNP</th>
              <th align="center" valign="middle" style="border-top:solid thin;border-bottom:solid thin">CHR</th>
              <th align="center" valign="middle" style="border-top:solid thin;border-bottom:solid thin">POS</th>
              <th align="center" valign="middle" style="border-top:solid thin;border-bottom:solid thin">A1</th>
              <th align="center" valign="middle" style="border-top:solid thin;border-bottom:solid thin">A2</th>
              <th align="center" valign="middle" style="border-top:solid thin;border-bottom:solid thin">Frequency</th>
              <th align="center" valign="middle" style="border-top:solid thin;border-bottom:solid thin">&#x3B2;</th>
              <th align="center" valign="middle" style="border-top:solid thin;border-bottom:solid thin">SE</th>
              <th align="center" valign="middle" style="border-top:solid thin;border-bottom:solid thin">
                <italic>p</italic>
              </th>
              <th align="center" valign="middle" style="border-top:solid thin;border-bottom:solid thin">N</th>
              <th align="center" valign="middle" style="border-top:solid thin;border-bottom:solid thin">Cohort</th>
            </tr>
          </thead>
          <tbody>
            <tr>
              <td align="center" valign="middle">1</td>
              <td align="center" valign="middle">rs59190052</td>
              <td align="center" valign="middle">12</td>
              <td align="center" valign="middle">101640969</td>
              <td align="center" valign="middle">A</td>
              <td align="center" valign="middle">G</td>
              <td align="center" valign="middle">0.23</td>
              <td align="center" valign="middle">0.447</td>
              <td align="center" valign="middle">0.08</td>
              <td align="center" valign="middle">3.92 &#xD7; 10<sup>&#x2212;8</sup></td>
              <td align="center" valign="middle">396</td>
              <td align="center" valign="middle">IFS</td>
            </tr>
            <tr>
              <td align="center" valign="middle">2</td>
              <td align="center" valign="middle">rs9830884</td>
              <td align="center" valign="middle">3</td>
              <td align="center" valign="middle">73612432</td>
              <td align="center" valign="middle">C</td>
              <td align="center" valign="middle">A</td>
              <td align="center" valign="middle">0.29</td>
              <td align="center" valign="middle">0.411</td>
              <td align="center" valign="middle">0.08</td>
              <td align="center" valign="middle">4.82 &#xD7; 10<sup>&#x2212;8</sup></td>
              <td align="center" valign="middle">396</td>
              <td align="center" valign="middle">IFS</td>
            </tr>
            <tr>
              <td align="center" valign="middle">3</td>
              <td align="center" valign="middle">rs77322490</td>
              <td align="center" valign="middle">11</td>
              <td align="center" valign="middle">125701344</td>
              <td align="center" valign="middle">T</td>
              <td align="center" valign="middle">C</td>
              <td align="center" valign="middle">0.19</td>
              <td align="center" valign="middle">0.48</td>
              <td align="center" valign="middle">0.09</td>
              <td align="center" valign="middle">4.92 &#xD7; 10<sup>&#x2212;8</sup></td>
              <td align="center" valign="middle">396</td>
              <td align="center" valign="middle">IFS</td>
            </tr>
            <tr>
              <td align="center" valign="middle">4</td>
              <td align="center" valign="middle">rs6844159</td>
              <td align="center" valign="middle">4</td>
              <td align="center" valign="middle">121794535</td>
              <td align="center" valign="middle">C</td>
              <td align="center" valign="middle">T</td>
              <td align="center" valign="middle">0.3</td>
              <td align="center" valign="middle">0.4</td>
              <td align="center" valign="middle">0.08</td>
              <td align="center" valign="middle">1.01 &#xD7; 10<sup>&#x2212;7</sup></td>
              <td align="center" valign="middle">396</td>
              <td align="center" valign="middle">IFS</td>
            </tr>
            <tr>
              <td align="center" valign="middle">5</td>
              <td align="center" valign="middle">rs3947271</td>
              <td align="center" valign="middle">12</td>
              <td align="center" valign="middle">43735470</td>
              <td align="center" valign="middle">A</td>
              <td align="center" valign="middle">C</td>
              <td align="center" valign="middle">0.19</td>
              <td align="center" valign="middle">0.458</td>
              <td align="center" valign="middle">0.09</td>
              <td align="center" valign="middle">1.39 &#xD7; 10<sup>&#x2212;7</sup></td>
              <td align="center" valign="middle">396</td>
              <td align="center" valign="middle">IFS</td>
            </tr>
            <tr>
              <td align="center" valign="middle">6</td>
              <td align="center" valign="middle">rs1089941</td>
              <td align="center" valign="middle">12</td>
              <td align="center" valign="middle">108759443</td>
              <td align="center" valign="middle">T</td>
              <td align="center" valign="middle">G</td>
              <td align="center" valign="middle">0.16</td>
              <td align="center" valign="middle">0.491</td>
              <td align="center" valign="middle">0.09</td>
              <td align="center" valign="middle">1.47 &#xD7; 10<sup>&#x2212;7</sup></td>
              <td align="center" valign="middle">396</td>
              <td align="center" valign="middle">IFS</td>
            </tr>
            <tr>
              <td align="center" valign="middle">7</td>
              <td align="center" valign="middle">rs1491071</td>
              <td align="center" valign="middle">6</td>
              <td align="center" valign="middle">113566803</td>
              <td align="center" valign="middle">C</td>
              <td align="center" valign="middle">T</td>
              <td align="center" valign="middle">0.22</td>
              <td align="center" valign="middle">0.436</td>
              <td align="center" valign="middle">0.08</td>
              <td align="center" valign="middle">1.73 &#xD7; 10<sup>&#x2212;7</sup></td>
              <td align="center" valign="middle">396</td>
              <td align="center" valign="middle">IFS</td>
            </tr>
            <tr>
              <td align="center" valign="middle">8</td>
              <td align="center" valign="middle">rs2018981</td>
              <td align="center" valign="middle">8</td>
              <td align="center" valign="middle">98266984</td>
              <td align="center" valign="middle">T</td>
              <td align="center" valign="middle">A</td>
              <td align="center" valign="middle">0.13</td>
              <td align="center" valign="middle">0.535</td>
              <td align="center" valign="middle">0.1</td>
              <td align="center" valign="middle">2.32 &#xD7; 10<sup>&#x2212;7</sup></td>
              <td align="center" valign="middle">396</td>
              <td align="center" valign="middle">IFS</td>
            </tr>
            <tr>
              <td align="center" valign="middle">9</td>
              <td align="center" valign="middle">rs11587481</td>
              <td align="center" valign="middle">1</td>
              <td align="center" valign="middle">7611159</td>
              <td align="center" valign="middle">G</td>
              <td align="center" valign="middle">T</td>
              <td align="center" valign="middle">0.19</td>
              <td align="center" valign="middle">0.443</td>
              <td align="center" valign="middle">0.09</td>
              <td align="center" valign="middle">4.93 &#xD7; 10<sup>&#x2212;7</sup></td>
              <td align="center" valign="middle">396</td>
              <td align="center" valign="middle">IFS</td>
            </tr>
            <tr>
              <td align="center" valign="middle">10</td>
              <td align="center" valign="middle">rs11199332</td>
              <td align="center" valign="middle">10</td>
              <td align="center" valign="middle">122186330</td>
              <td align="center" valign="middle">A</td>
              <td align="center" valign="middle">G</td>
              <td align="center" valign="middle">0.11</td>
              <td align="center" valign="middle">0.557</td>
              <td align="center" valign="middle">0.11</td>
              <td align="center" valign="middle">6.38 &#xD7; 10<sup>&#x2212;7</sup></td>
              <td align="center" valign="middle">396</td>
              <td align="center" valign="middle">IFS</td>
            </tr>
            <tr>
              <td align="center" valign="middle">11</td>
              <td align="center" valign="middle">rs11241707</td>
              <td align="center" valign="middle">5</td>
              <td align="center" valign="middle">123005420</td>
              <td align="center" valign="middle">A</td>
              <td align="center" valign="middle">G</td>
              <td align="center" valign="middle">0.45</td>
              <td align="center" valign="middle">&#x2212;0.34</td>
              <td align="center" valign="middle">0.07</td>
              <td align="center" valign="middle">9.34 &#xD7; 10<sup>&#x2212;7</sup></td>
              <td align="center" valign="middle">396</td>
              <td align="center" valign="middle">IFS</td>
            </tr>
            <tr>
              <td align="center" valign="middle">12</td>
              <td align="center" valign="middle">rs12429729</td>
              <td align="center" valign="middle">13</td>
              <td align="center" valign="middle">27568586</td>
              <td align="center" valign="middle">A</td>
              <td align="center" valign="middle">C</td>
              <td align="center" valign="middle">0.1</td>
              <td align="center" valign="middle">0.769</td>
              <td align="center" valign="middle">0.12</td>
              <td align="center" valign="middle">3.68 &#xD7; 10<sup>&#x2212;10</sup></td>
              <td align="center" valign="middle">325</td>
              <td align="center" valign="middle">COHRA1</td>
            </tr>
            <tr>
              <td align="center" valign="middle">13</td>
              <td align="center" valign="middle">rs7463853</td>
              <td align="center" valign="middle">8</td>
              <td align="center" valign="middle">82662694</td>
              <td align="center" valign="middle">G</td>
              <td align="center" valign="middle">A</td>
              <td align="center" valign="middle">0.23</td>
              <td align="center" valign="middle">0.547</td>
              <td align="center" valign="middle">0.09</td>
              <td align="center" valign="middle">5.48 &#xD7; 10<sup>&#x2212;10</sup></td>
              <td align="center" valign="middle">326</td>
              <td align="center" valign="middle">COHRA1</td>
            </tr>
            <tr>
              <td align="center" valign="middle">14</td>
              <td align="center" valign="middle">rs690435</td>
              <td align="center" valign="middle">15</td>
              <td align="center" valign="middle">41132310</td>
              <td align="center" valign="middle">C</td>
              <td align="center" valign="middle">T</td>
              <td align="center" valign="middle">0.31</td>
              <td align="center" valign="middle">0.438</td>
              <td align="center" valign="middle">0.08</td>
              <td align="center" valign="middle">5.78 &#xD7; 10<sup>&#x2212;8</sup></td>
              <td align="center" valign="middle">328</td>
              <td align="center" valign="middle">COHRA1</td>
            </tr>
            <tr>
              <td align="center" valign="middle">15</td>
              <td align="center" valign="middle">rs12994450</td>
              <td align="center" valign="middle">2</td>
              <td align="center" valign="middle">53649620</td>
              <td align="center" valign="middle">C</td>
              <td align="center" valign="middle">T</td>
              <td align="center" valign="middle">0.29</td>
              <td align="center" valign="middle">0.44</td>
              <td align="center" valign="middle">0.08</td>
              <td align="center" valign="middle">8.26 &#xD7; 10<sup>&#x2212;8</sup></td>
              <td align="center" valign="middle">328</td>
              <td align="center" valign="middle">COHRA1</td>
            </tr>
            <tr>
              <td align="center" valign="middle">16</td>
              <td align="center" valign="middle">rs11654217</td>
              <td align="center" valign="middle">17</td>
              <td align="center" valign="middle">45531884</td>
              <td align="center" valign="middle">G</td>
              <td align="center" valign="middle">T</td>
              <td align="center" valign="middle">0.23</td>
              <td align="center" valign="middle">0.462</td>
              <td align="center" valign="middle">0.09</td>
              <td align="center" valign="middle">2.73 &#xD7; 10<sup>&#x2212;7</sup></td>
              <td align="center" valign="middle">328</td>
              <td align="center" valign="middle">COHRA1</td>
            </tr>
            <tr>
              <td align="center" valign="middle">17</td>
              <td align="center" valign="middle">rs264532</td>
              <td align="center" valign="middle">5</td>
              <td align="center" valign="middle">61624327</td>
              <td align="center" valign="middle">C</td>
              <td align="center" valign="middle">T</td>
              <td align="center" valign="middle">0.14</td>
              <td align="center" valign="middle">&#x2212;0.55</td>
              <td align="center" valign="middle">0.11</td>
              <td align="center" valign="middle">3.33 &#xD7; 10<sup>&#x2212;7</sup></td>
              <td align="center" valign="middle">328</td>
              <td align="center" valign="middle">COHRA1</td>
            </tr>
            <tr>
              <td align="center" valign="middle">18</td>
              <td align="center" valign="middle">rs12797571</td>
              <td align="center" valign="middle">11</td>
              <td align="center" valign="middle">25880475</td>
              <td align="center" valign="middle">G</td>
              <td align="center" valign="middle">C</td>
              <td align="center" valign="middle">0.51</td>
              <td align="center" valign="middle">0.382</td>
              <td align="center" valign="middle">0.08</td>
              <td align="center" valign="middle">3.80 &#xD7; 10<sup>&#x2212;7</sup></td>
              <td align="center" valign="middle">328</td>
              <td align="center" valign="middle">COHRA1</td>
            </tr>
            <tr>
              <td align="center" valign="middle">19</td>
              <td align="center" valign="middle">rs11970843</td>
              <td align="center" valign="middle">7</td>
              <td align="center" valign="middle">155917252</td>
              <td align="center" valign="middle">A</td>
              <td align="center" valign="middle">G</td>
              <td align="center" valign="middle">0.21</td>
              <td align="center" valign="middle">0.497</td>
              <td align="center" valign="middle">0.1</td>
              <td align="center" valign="middle">7.33 &#xD7; 10<sup>&#x2212;7</sup></td>
              <td align="center" valign="middle">278</td>
              <td align="center" valign="middle">COHRA1</td>
            </tr>
            <tr>
              <td align="center" valign="middle">20</td>
              <td align="center" valign="middle">rs4663531</td>
              <td align="center" valign="middle">2</td>
              <td align="center" valign="middle">235893092</td>
              <td align="center" valign="middle">G</td>
              <td align="center" valign="middle">A</td>
              <td align="center" valign="middle">0.25</td>
              <td align="center" valign="middle">0.429</td>
              <td align="center" valign="middle">0.09</td>
              <td align="center" valign="middle">8.73 &#xD7; 10<sup>&#x2212;7</sup></td>
              <td align="center" valign="middle">328</td>
              <td align="center" valign="middle">COHRA1</td>
            </tr>
            <tr>
              <td align="center" valign="middle">21</td>
              <td align="center" valign="middle">
                <bold>rs2090166</bold>
              </td>
              <td align="center" valign="middle">1</td>
              <td align="center" valign="middle">64750226</td>
              <td align="center" valign="middle">C</td>
              <td align="center" valign="middle">T</td>
              <td align="center" valign="middle">0.14</td>
              <td align="center" valign="middle">0.434</td>
              <td align="center" valign="middle">0.07</td>
              <td align="center" valign="middle">2.33 &#xD7; 10<sup>&#x2212;9</sup></td>
              <td align="center" valign="middle">773</td>
              <td align="center" valign="middle">COHRA2</td>
            </tr>
            <tr>
              <td align="center" valign="middle">22</td>
              <td align="center" valign="middle">rs3786738</td>
              <td align="center" valign="middle">19</td>
              <td align="center" valign="middle">48716187</td>
              <td align="center" valign="middle">T</td>
              <td align="center" valign="middle">C</td>
              <td align="center" valign="middle">0.1</td>
              <td align="center" valign="middle">0.458</td>
              <td align="center" valign="middle">0.08</td>
              <td align="center" valign="middle">3.59 &#xD7; 10<sup>&#x2212;8</sup></td>
              <td align="center" valign="middle">772</td>
              <td align="center" valign="middle">COHRA2</td>
            </tr>
            <tr>
              <td align="center" valign="middle">23</td>
              <td align="center" valign="middle">rs11817228</td>
              <td align="center" valign="middle">10</td>
              <td align="center" valign="middle">10340951</td>
              <td align="center" valign="middle">C</td>
              <td align="center" valign="middle">T</td>
              <td align="center" valign="middle">0.11</td>
              <td align="center" valign="middle">0.44</td>
              <td align="center" valign="middle">0.08</td>
              <td align="center" valign="middle">4.22 &#xD7; 10<sup>&#x2212;8</sup></td>
              <td align="center" valign="middle">771</td>
              <td align="center" valign="middle">COHRA2</td>
            </tr>
            <tr>
              <td align="center" valign="middle">24</td>
              <td align="center" valign="middle">rs512158</td>
              <td align="center" valign="middle">6</td>
              <td align="center" valign="middle">125415660</td>
              <td align="center" valign="middle">G</td>
              <td align="center" valign="middle">A</td>
              <td align="center" valign="middle">0.12</td>
              <td align="center" valign="middle">0.424</td>
              <td align="center" valign="middle">0.08</td>
              <td align="center" valign="middle">5.82 &#xD7; 10<sup>&#x2212;8</sup></td>
              <td align="center" valign="middle">769</td>
              <td align="center" valign="middle">COHRA2</td>
            </tr>
            <tr>
              <td align="center" valign="middle">25</td>
              <td align="center" valign="middle">rs622516</td>
              <td align="center" valign="middle">10</td>
              <td align="center" valign="middle">102082135</td>
              <td align="center" valign="middle">C</td>
              <td align="center" valign="middle">T</td>
              <td align="center" valign="middle">0.15</td>
              <td align="center" valign="middle">0.374</td>
              <td align="center" valign="middle">0.07</td>
              <td align="center" valign="middle">1.31 &#xD7; 10<sup>&#x2212;7</sup></td>
              <td align="center" valign="middle">760</td>
              <td align="center" valign="middle">COHRA2</td>
            </tr>
            <tr>
              <td align="center" valign="middle">26</td>
              <td align="center" valign="middle">rs71508615</td>
              <td align="center" valign="middle">9</td>
              <td align="center" valign="middle">24787071</td>
              <td align="center" valign="middle">G</td>
              <td align="center" valign="middle">A</td>
              <td align="center" valign="middle">0.11</td>
              <td align="center" valign="middle">0.423</td>
              <td align="center" valign="middle">0.08</td>
              <td align="center" valign="middle">1.40 &#xD7; 10<sup>&#x2212;7</sup></td>
              <td align="center" valign="middle">772</td>
              <td align="center" valign="middle">COHRA2</td>
            </tr>
            <tr>
              <td align="center" valign="middle">27</td>
              <td align="center" valign="middle">rs9982623</td>
              <td align="center" valign="middle">21</td>
              <td align="center" valign="middle">47691216</td>
              <td align="center" valign="middle">T</td>
              <td align="center" valign="middle">C</td>
              <td align="center" valign="middle">0.13</td>
              <td align="center" valign="middle">0.392</td>
              <td align="center" valign="middle">0.07</td>
              <td align="center" valign="middle">1.44 &#xD7; 10<sup>&#x2212;7</sup></td>
              <td align="center" valign="middle">773</td>
              <td align="center" valign="middle">COHRA2</td>
            </tr>
            <tr>
              <td align="center" valign="middle">28</td>
              <td align="center" valign="middle">rs2869342</td>
              <td align="center" valign="middle">4</td>
              <td align="center" valign="middle">86320413</td>
              <td align="center" valign="middle">T</td>
              <td align="center" valign="middle">C</td>
              <td align="center" valign="middle">0.31</td>
              <td align="center" valign="middle">0.281</td>
              <td align="center" valign="middle">0.05</td>
              <td align="center" valign="middle">2.20 &#xD7; 10<sup>&#x2212;7</sup></td>
              <td align="center" valign="middle">768</td>
              <td align="center" valign="middle">COHRA2</td>
            </tr>
            <tr>
              <td align="center" valign="middle">29</td>
              <td align="center" valign="middle">rs17536922</td>
              <td align="center" valign="middle">15</td>
              <td align="center" valign="middle">85461106</td>
              <td align="center" valign="middle">T</td>
              <td align="center" valign="middle">G</td>
              <td align="center" valign="middle">0.11</td>
              <td align="center" valign="middle">0.418</td>
              <td align="center" valign="middle">0.08</td>
              <td align="center" valign="middle">2.50 &#xD7; 10<sup>&#x2212;7</sup></td>
              <td align="center" valign="middle">728</td>
              <td align="center" valign="middle">COHRA2</td>
            </tr>
            <tr>
              <td align="center" valign="middle">30</td>
              <td align="center" valign="middle">rs10651815</td>
              <td align="center" valign="middle">21</td>
              <td align="center" valign="middle">43045398</td>
              <td align="center" valign="middle">G</td>
              <td align="center" valign="middle">C</td>
              <td align="center" valign="middle">0.27</td>
              <td align="center" valign="middle">&#x2212;0.29</td>
              <td align="center" valign="middle">0.06</td>
              <td align="center" valign="middle">2.77 &#xD7; 10<sup>&#x2212;7</sup></td>
              <td align="center" valign="middle">759</td>
              <td align="center" valign="middle">COHRA2</td>
            </tr>
            <tr>
              <td align="center" valign="middle">31</td>
              <td align="center" valign="middle">rs1958016</td>
              <td align="center" valign="middle">14</td>
              <td align="center" valign="middle">33605479</td>
              <td align="center" valign="middle">C</td>
              <td align="center" valign="middle">A</td>
              <td align="center" valign="middle">0.19</td>
              <td align="center" valign="middle">0.338</td>
              <td align="center" valign="middle">0.07</td>
              <td align="center" valign="middle">3.42 &#xD7; 10<sup>&#x2212;7</sup></td>
              <td align="center" valign="middle">713</td>
              <td align="center" valign="middle">COHRA2</td>
            </tr>
            <tr>
              <td align="center" valign="middle">32</td>
              <td align="center" valign="middle">rs73723358</td>
              <td align="center" valign="middle">7</td>
              <td align="center" valign="middle">106399401</td>
              <td align="center" valign="middle">G</td>
              <td align="center" valign="middle">A</td>
              <td align="center" valign="middle">0.11</td>
              <td align="center" valign="middle">0.403</td>
              <td align="center" valign="middle">0.08</td>
              <td align="center" valign="middle">4.68 &#xD7; 10<sup>&#x2212;7</sup></td>
              <td align="center" valign="middle">752</td>
              <td align="center" valign="middle">COHRA2</td>
            </tr>
            <tr>
              <td align="center" valign="middle">33</td>
              <td align="center" valign="middle">rs7972868</td>
              <td align="center" valign="middle">12</td>
              <td align="center" valign="middle">26695988</td>
              <td align="center" valign="middle">C</td>
              <td align="center" valign="middle">T</td>
              <td align="center" valign="middle">0.18</td>
              <td align="center" valign="middle">0.326</td>
              <td align="center" valign="middle">0.07</td>
              <td align="center" valign="middle">5.96 &#xD7; 10<sup>&#x2212;7</sup></td>
              <td align="center" valign="middle">769</td>
              <td align="center" valign="middle">COHRA2</td>
            </tr>
            <tr>
              <td align="center" valign="middle">34</td>
              <td align="center" valign="middle">rs73157913</td>
              <td align="center" valign="middle">22</td>
              <td align="center" valign="middle">25284280</td>
              <td align="center" valign="middle">G</td>
              <td align="center" valign="middle">T</td>
              <td align="center" valign="middle">0.12</td>
              <td align="center" valign="middle">0.384</td>
              <td align="center" valign="middle">0.08</td>
              <td align="center" valign="middle">7.39 &#xD7; 10<sup>&#x2212;7</sup></td>
              <td align="center" valign="middle">740</td>
              <td align="center" valign="middle">COHRA2</td>
            </tr>
            <tr>
              <td align="center" valign="middle">35</td>
              <td align="center" valign="middle">rs11923408</td>
              <td align="center" valign="middle">3</td>
              <td align="center" valign="middle">28647903</td>
              <td align="center" valign="middle">C</td>
              <td align="center" valign="middle">G</td>
              <td align="center" valign="middle">0.28</td>
              <td align="center" valign="middle">0.282</td>
              <td align="center" valign="middle">0.06</td>
              <td align="center" valign="middle">8.14 &#xD7; 10<sup>&#x2212;7</sup></td>
              <td align="center" valign="middle">745</td>
              <td align="center" valign="middle">COHRA2</td>
            </tr>
            <tr>
              <td align="center" valign="middle">36</td>
              <td align="center" valign="middle">rs9685188</td>
              <td align="center" valign="middle">4</td>
              <td align="center" valign="middle">58066166</td>
              <td align="center" valign="middle">T</td>
              <td align="center" valign="middle">C</td>
              <td align="center" valign="middle">0.31</td>
              <td align="center" valign="middle">5.829</td>
              <td align="center" valign="middle">NA</td>
              <td align="center" valign="middle">5.57 &#xD7; 10<sup>&#x2212;9</sup></td>
              <td align="center" valign="middle">1446</td>
              <td align="center" valign="middle">Meta</td>
            </tr>
            <tr>
              <td align="center" valign="middle">37</td>
              <td align="center" valign="middle">
                <bold>rs3862191</bold>
              </td>
              <td align="center" valign="middle">1</td>
              <td align="center" valign="middle">64753505</td>
              <td align="center" valign="middle">T</td>
              <td align="center" valign="middle">C</td>
              <td align="center" valign="middle">0.17</td>
              <td align="center" valign="middle">5.547</td>
              <td align="center" valign="middle">NA</td>
              <td align="center" valign="middle">2.90 &#xD7; 10<sup>&#x2212;8</sup></td>
              <td align="center" valign="middle">1486</td>
              <td align="center" valign="middle">Meta</td>
            </tr>
            <tr>
              <td align="center" valign="middle">38</td>
              <td align="center" valign="middle">rs11592458</td>
              <td align="center" valign="middle">10</td>
              <td align="center" valign="middle">17053179</td>
              <td align="center" valign="middle">C</td>
              <td align="center" valign="middle">G</td>
              <td align="center" valign="middle">0.12</td>
              <td align="center" valign="middle">5.064</td>
              <td align="center" valign="middle">NA</td>
              <td align="center" valign="middle">4.10 &#xD7; 10<sup>&#x2212;7</sup></td>
              <td align="center" valign="middle">1487</td>
              <td align="center" valign="middle">Meta</td>
            </tr>
            <tr>
              <td align="center" valign="middle">39</td>
              <td align="center" valign="middle">rs1497945</td>
              <td align="center" valign="middle">4</td>
              <td align="center" valign="middle">167043469</td>
              <td align="center" valign="middle">A</td>
              <td align="center" valign="middle">T</td>
              <td align="center" valign="middle">0.35</td>
              <td align="center" valign="middle">5.03</td>
              <td align="center" valign="middle">NA</td>
              <td align="center" valign="middle">4.91 &#xD7; 10<sup>&#x2212;7</sup></td>
              <td align="center" valign="middle">1496</td>
              <td align="center" valign="middle">Meta</td>
            </tr>
            <tr>
              <td align="center" valign="middle" style="border-bottom:solid thin">40</td>
              <td align="center" valign="middle" style="border-bottom:solid thin">rs1978471</td>
              <td align="center" valign="middle" style="border-bottom:solid thin">19</td>
              <td align="center" valign="middle" style="border-bottom:solid thin">24024926</td>
              <td align="center" valign="middle" style="border-bottom:solid thin">T</td>
              <td align="center" valign="middle" style="border-bottom:solid thin">C</td>
              <td align="center" valign="middle" style="border-bottom:solid thin">0.18</td>
              <td align="center" valign="middle" style="border-bottom:solid thin">4.942</td>
              <td align="center" valign="middle" style="border-bottom:solid thin">NA</td>
              <td align="center" valign="middle" style="border-bottom:solid thin">7.74 &#xD7; 10<sup>&#x2212;7</sup></td>
              <td align="center" valign="middle" style="border-bottom:solid thin">1489</td>
              <td align="center" valign="middle" style="border-bottom:solid thin">Meta</td>
            </tr>
          </tbody>
        </table>
        <table-wrap-foot>
          <fn>
            <p>Note: CHR: chromosome; POS: position; A1: effect allele; A2: reference allele; Frequency: frequency of effect allele; &#x3B2;: effect size of effect allele; SE: standard error; <italic>p</italic>: <italic>p</italic>-values; N: sample size; IFS: Iowa Fluoride Study; COHRA1: Center for Oral Health Research in Appalachia, cohort 1; COHRA2: Center for Oral Health Research in Appalachia, cohort 2. rs2090166 and rs3862191 (bolded in SNP column) are in high linkage disequilibrium with r<sup>2</sup> = 0.98. The significant level was <italic>p</italic> &lt; 1 &#xD7; 10<sup>&#x2212;6</sup>.</p>
          </fn>
        </table-wrap-foot>
      </table-wrap>
    </sec>
  <fn-group>
    <fn>
        <p><bold>Disclaimer/Publisher&#x2019;s Note:</bold> The statements, opinions and data contained in all publications are solely those of the individual author(s) and contributor(s) and not of MDPI and/or the editor(s). MDPI and/or the editor(s) disclaim responsibility for any injury to people or property resulting from any ideas, methods, instructions or products referred to in the content.</p>
    </fn>
    </fn-group>
</back>
</article>
